1 NetPyNE: a tool for data-driven multiscale modeling  
2 of brain circuits

3 Salvador Dura-Bernal<sup>1</sup>  
Benjamin A Suter<sup>2</sup>  
Padraig Gleeson<sup>3</sup>  
Matteo Cantarelli<sup>4</sup>  
Adrian Quintana<sup>5</sup>  
Facundo Rodriguez<sup>1</sup>  
David J Kedziora<sup>6</sup>  
George L Chadderdon<sup>6</sup>  
Cliff C Kerr<sup>6</sup>  
Samuel A Neymotin<sup>7</sup>  
Robert McDougal<sup>8,9</sup>  
Michael Hines<sup>8</sup>  
Gordon M G Shepherd<sup>10</sup>  
William W Lytton<sup>1,11</sup>

<sup>1</sup> Dept. Physiology & Pharmacology, SUNY Downstate, USA

<sup>2</sup> Institute of Science and Technology (IST) Austria, Austria

<sup>3</sup> Dept. Neuroscience, Physiology and Pharmacology, University College London, UK

<sup>4</sup> Metacell LLC, USA

<sup>5</sup> EyeSeeTea Ltd., UK

<sup>6</sup> Complex Systems Group, School of Physics, University of Sydney, Australia

<sup>7</sup> Nathan Kline Institute for Psychiatric Research, USA

<sup>8</sup> Dept. of Neuroscience and School of Medicine, Yale University, USA

<sup>9</sup> Center for Medical Informatics, Yale University, USA

<sup>10</sup> Department of Physiology, Northwestern University, USA

<sup>11</sup> Dept. Neurology, Kings County Hospital Center, USA

4 December 17, 2018

## Abstract

Biophysical modeling of neuronal networks helps to integrate and interpret rapidly growing and disparate experimental datasets at multiple scales. The NetPyNE tool ([www.netpyne.org](http://www.netpyne.org)) provides both programmatic and graphical interfaces to develop data-driven multiscale network models in NEURON. NetPyNE clearly separates model parameters from implementation code. Users provide specifications at a high level via a standardized declarative language, *e.g.*, a connectivity rule, instead of tens of loops to create millions of cell-to-cell connections. Users can then generate the NEURON network, run efficiently parallelized simulations, optimize and explore network parameters through automated batch runs, and use built-in functions for visualization and analysis – connectivity matrices, voltage traces, raster plots, local field potentials, and information theoretic measures. NetPyNE also facilitates model sharing by exporting and importing using NeuroML and SONATA standardized formats. NetPyNE is already being used to teach computational neuroscience students and by modelers to investigate different brain regions and phenomena.

## 1 Introduction

The worldwide upsurge of neuroscience research through the BRAIN Initiative, Human Brain Project, and other efforts is yielding unprecedented levels of experimental findings from many different species, brain regions, scales and techniques. As highlighted in the BRAIN Initiative 2025 report,<sup>1</sup> these initiatives require computational tools to consolidate and interpret the data, and translate isolated findings into an understanding of brain function. Biophysically-detailed multiscale modeling (MSM) provides a unique method for integrating, organizing and bridging these many types of data. For example, data coming from brain slices must be compared and consolidated with *in vivo* data. These data domains cannot be compared directly, but can be potentially compared through simulations that permit one to switch readily back-and-forth between slice-simulation and *in vivo* simulation. Furthermore, these multiscale models permit one to develop hypotheses about how biological mechanisms underlie brain function. The MSM approach is essential to understand how subcellular, cellular and circuit-level components of complex neural systems interact to yield neural function and behavior.<sup>2-4</sup> It also provides the bridge to more compact theoretical domains, such as low-dimensional dynamics, analytic modeling and information theory.<sup>5-7</sup>

NEURON is the leading simulator in the domain of multiscale neuronal modeling.<sup>8</sup> It has 648 models available via ModelDB,<sup>9</sup> and over 2,000 NEURON-based publications ([neuron.yale.edu/neuron/publications/neuron-bibliography](http://neuron.yale.edu/neuron/publications/neuron-bibliography)). However, building data-driven large-scale networks and running parallel simulations in NEURON is technically challenging,<sup>10</sup> requiring integration of custom frameworks needed to build and organize complex model components across multiple scales. Other key elements of the modeling workflow such as ensuring replicability, optimizing parameters and analyzing results also need to be implemented separately by each user.<sup>11,12</sup> Lack of model standardization makes it hard to understand, reproduce and reuse many existing models and simulation results.

We introduce a new software tool, NetPyNE<sup>†</sup>. NetPyNE addresses these issues and relieves the user from much of the time-consuming coding previously needed for these ancillary modeling tasks, automating

---

<sup>†</sup>NetPyNE: **N**etwork specification, simulation and analysis using **P**ython and **N**EURON.

42 many network modeling requirements for the setup, run, explore and analysis stages. NetPyNE enables  
43 users to consolidate complex experimental data with prior models and other external data sources at  
44 different scales into a unified computational model. Users can then simulate and analyze the model in the  
45 NetPyNE framework in order to better understand brain structure, brain dynamics and ultimately brain  
46 structure-function relationships. The NetPyNE framework combines: **1.** flexible, rule-based, high-level  
47 standardized specifications covering scales from molecule to cell to network; **2.** efficient parallel simulation  
48 both on stand-alone computers and in high-performance computing (HPC) clusters; **3.** automated data  
49 analysis and visualization (*e.g.*, connectivity, neural activity, information theoretic analysis);  
50 **4.** standardized input/output formats, importing of existing NEURON cell models, and conversion to/from  
51 NeuroML,<sup>13,14</sup> **5.** automated parameter tuning (molecular to network levels) using grid search and  
52 evolutionary algorithms. All tool features are available programmatically or via an integrated graphical  
53 user interface (GUI). This centralized organization gives the user the ability to interact readily with the  
54 various components (for building, simulating, optimizing and analyzing networks), without requiring  
55 additional installation, setup, training and format conversion across multiple tools.

56 NetPyNE's high-level specifications are implemented as a declarative language designed to facilitate  
57 the definition of data-driven multiscale network models by accommodating many of the intricacies of  
58 experimental data, such as complex subcellular mechanisms, the distribution of synapses across  
59 fully-detailed dendrites, and time-varying stimulation. Contrasting with the obscurity of raw-code  
60 descriptions used in many existing models,<sup>15</sup> NetPyNE's standardized language provides transparent and  
61 manageable descriptions. Model specifications are then translated into the necessary NEURON components  
62 via built-in algorithms. This approach cleanly separates model specifications from the underlying technical  
63 implementation. Users avoid complex low-level coding, preventing implementation errors, inefficiencies and  
64 flawed results that are common during the development of complex multiscale models. Crucially, users  
65 retain control of the model design choices, including the conceptual model, level of biological detail, scales  
66 to include, and biological parameter values. The NetPyNE tool allows users to shift their time, effort and  
67 focus from low-level coding to designing a model that matches the biological details at the chosen scales.

68 NetPyNE is one of several tools that facilitate network modeling with NEURON: neuroConstruct,<sup>16</sup>  
69 PyNN,<sup>17</sup> Topographica,<sup>18</sup> ARACHNE<sup>19</sup> and BioNet.<sup>20</sup> NetPyNE differs from these in terms of the range  
70 of scales, from molecular up to large networks and extracellular space simulation – it is the only tool that  
71 supports NEURON's Reaction-Diffusion (RxD) module.<sup>21,22</sup> It also provides an easy declarative format for  
72 the definition of complex, experimentally-derived rules to distribute synapses across dendrites. NetPyNE is  
73 also unique in integrating a standardized declarative language, automated parameter optimization and a  
74 GUI designed to work across all these scales.

75 NetPyNE therefore streamlines the modeling workflow, consequently accelerating the iteration  
76 between modeling and experiment. By reducing programming challenges, our tool also makes multiscale  
77 modeling highly accessible to a wide range of users in the neuroscience community. NetPyNE is publicly  
78 available from [www.netpyne.org](http://www.netpyne.org), which includes installation instructions, documentation, tutorials,  
79 example models and Q&A forums. The tool has already been used by over 40 researchers in different labs  
80 to train students and to model a variety of brain regions and phenomena (see  
81 [www.netpyne.org/models](http://www.netpyne.org/models)).<sup>23–26</sup> Additionally, it has also been integrated with other tools in the

82 neuroscience community: the Human Neocortical Neurosolver (<https://hnn.brown.edu/>),<sup>27,28</sup> Open Source  
 83 Brain<sup>29</sup> ([www.opensourcebrain.org](http://www.opensourcebrain.org)),<sup>14</sup> and the Neuroscience Gateway<sup>30</sup> ([www.nsgportal.org](http://www.nsgportal.org)).

## 84 2 Results

### 85 2.1 Tool overview and workflow

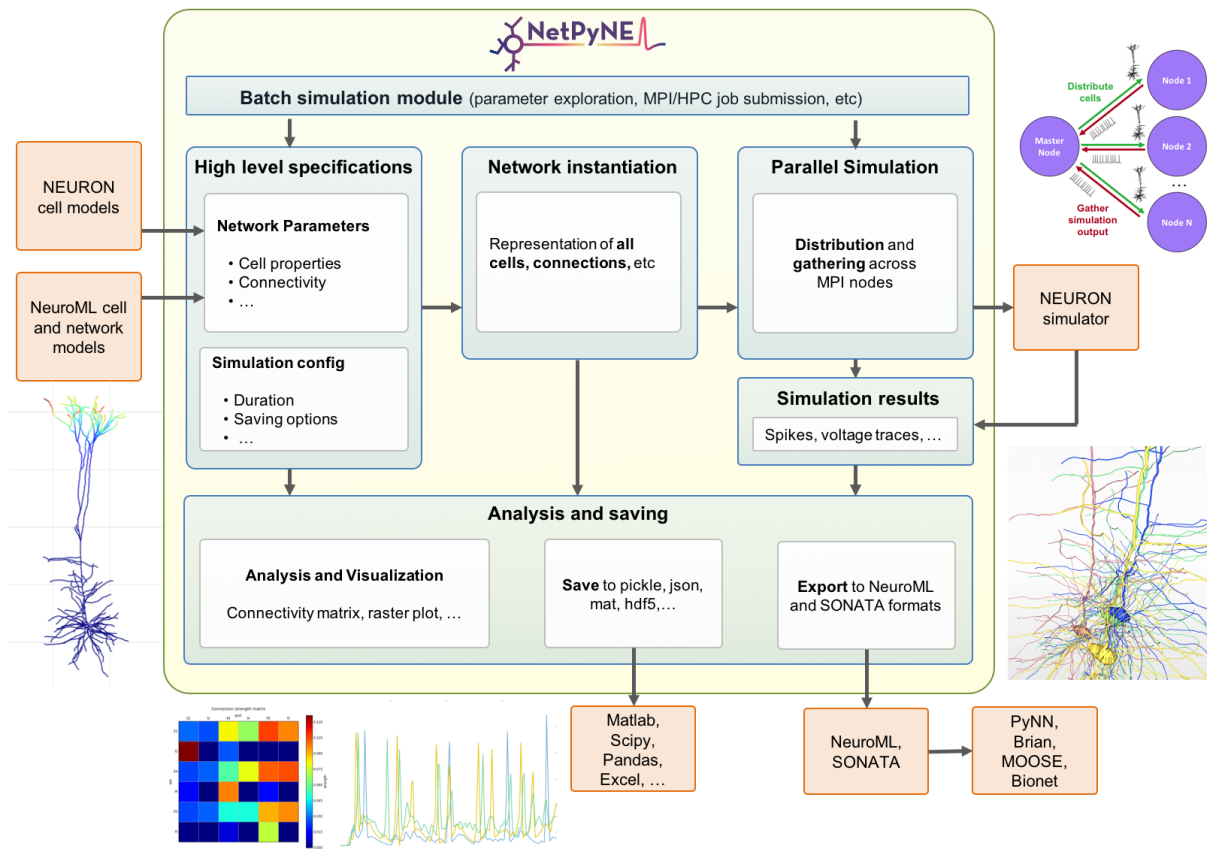

Figure 1: **Overview of NetPyNE components and workflow.** Users start by specifying the network parameters and simulation configuration using a high-level JSON-like format. Existing NEURON and NeuroML models can be imported. Next, a NEURON network model is instantiated based on these specifications. This model can be simulated in parallel using NEURON as the underlying simulation engine. Simulation results are gathered in the master node. Finally, the user can analyze the network and simulation results using a variety of plots; save to multiple formats or export to NeuroML. The Batch Simulation module enables automating this process to run multiple simulations on HPCs and explore a range of parameter values.

86 NetPyNE’s workflow consists of four main stages: **1.** high-level specification, **2.** network instantiation,  
 87 **3.** simulation and **4.** analysis and saving (Fig. 1). The first stage involves defining all the parameters  
 88 required to build the network, from population sizes to cell properties to connectivity rules, and the  
 89 simulation options, including duration, integration step, variables to record, *etc.* This is the main step

90 requiring input from the user, who can provide these inputs either programmatically with NetPyNE’s  
91 declarative language, or by using the GUI. NetPyNE also enables importing of existing cell models for use  
92 in a network.

93 The next stages can be accomplished with a single function call – or mouse click if using the GUI. The  
94 network instantiation step consists of creating all the cells, connections and stimuli based on the high-level  
95 parameters and rules provided by the user. The instantiated network is represented as a Python  
96 hierarchical structure that includes all the NEURON objects required to run a parallel simulation. This is  
97 followed by the simulation stage, where NetPyNE takes care of distributing the cells and connections across  
98 the available nodes, running the parallelized simulation, and gathering the data back in the master node.  
99 Here, NetPyNE is using NEURON as its back-end simulator, but all the technical complexities of parallel  
100 NEURON are hidden to the user. In the final stage, the user can plot a wide variety of figures to analyze  
101 the network and simulation output. The model and simulation output can be saved to common file formats  
102 and exported to NeuroML, a standard description for neural models.<sup>14</sup> This enables exploring the data  
103 using other tools (e.g. MATLAB) or importing and running the model using other simulators (e.g., NEST).

104 An additional overarching component enables users to automate these steps to run batches of  
105 simulations to explore model parameters. The user can define the range of values to explore for each  
106 parameter and customize one of the pre-defined configuration templates to automatically submit all the  
107 simulation jobs on multi-processor machines or supercomputers.

108 Each of these stages is implemented in modular fashion to make it possible to follow different  
109 workflows such as saving an instantiated network and then loading and running simulations at a later time.  
110 The following sections provide additional details about each simulation stage.

## 111 2.2 High-level specifications

112 A major challenge in building models is combining the data from many scales. In this respect, NetPyNE  
113 offers a substantial advantage by employing a human-readable, clean, rule-based shareable declarative  
114 language to specify networks and simulation configuration. These standardized high-level specifications  
115 employ a compact JSON-compatible format consisting of Python lists and dictionaries (Fig. 2). The  
116 objective of the high-level declarative language is to allow users to accurately describe the particulars and  
117 patterns observed at each biological scale, while hiding all the complex technical aspects required to  
118 implement them in NEURON. For example, one can define a probabilistic connectivity rule between two  
119 populations, instead of creating potentially millions of cell-to-cell connections with Python or hoc `for`  
120 loops. The high-level language enables structured specification of all the model parameters: populations,  
121 cell properties, connectivity, input stimulation and simulation configuration.

### 122 2.2.1 Population and cell parameters

123 Users define network populations, including their cell type, number of cells or density (in *cells/mm*<sup>3</sup>), and  
124 their spatial distribution. Fig. 2A-i,ii show setting of *yrange* and alternatively setting *numCells* or *density*  
125 for two cell types in the network. Morphological and biophysical properties can then be applied to subsets

126 of cells using custom rules. This enables, for example, setting properties for all cells in a population with a  
127 certain “cell type” attribute or within a spatial region. The flexibility of the declarative rule-based method  
128 allows the heterogeneity of cell populations observed experimentally to be captured. It also allows the use  
129 of cell implementations of different complexity to coexist in the same network, useful in very large models  
130 where full multi-scale is desired but cannot be implemented across all cells due to the computational size of  
131 the network. These alternative implementations could include highly simplified cell models such as  
132 Izhikevich, AdEx or precalculated point neuron models.<sup>31–33</sup> These can be combined in the same network  
133 model or swapped in and out: *e.g.*, **1.** explore overall network dynamics using simple point-neuron models;  
134 **2.** re-explore with more biologically realistic complex models to determine how complex cell dynamics  
135 contribute alters network dynamics. We also note that order of declaration is arbitrary; as here, one can  
136 define the density of typed cells before defining these types. In Fig. 2A-iii,iv, we define the two different  
137 *PYR* models whose distribution was defined in A-i,ii. The *simple* model is simple enough to be fully  
138 defined in NetPyNE – 1 compartment with Hodgkin-Huxley (*hh*) kinetics with the parameters listed (here  
139 the original *hh* parameters are given; typically these would be changed). More complex cells could also be  
140 defined in NetPyNE in this same way. More commonly, complex cells would be imported from hoc  
141 templates, Python classes or NeuroML templates, as shown in Fig. 2A-iv. Thus, any cell model available  
142 online can be downloaded and used as part of a network model (non-NEURON cell models must first be  
143 translated into NMODL/Python).<sup>34</sup> Note that unlike the other statements, Fig. 2A-iv is a procedure call  
144 rather than the setting of a dictionary value. The `importCellParams()` procedure call creates a new  
145 dictionary with NetPyNE’s data structure, which can then be modified later in the script or via GUI,  
146 before network instantiation.

147 NetPyNE’s declarative language also supports NEURON’s reaction-diffusion RxD specifications of  
148 Regions, Species and Reactions.<sup>21,22</sup> RxD simplifies the declaration of the chemophysiology – intracellular  
149 and extracellular signaling dynamics – that complements electrophysiology. During network instantiation,  
150 RxD declarative specifications are translated into RxD components within or between cells of the  
151 NetPyNE-defined network. This adds additional scales – subcellular, organelle, extracellular matrix – to  
152 the exploration of multiscale interactions, *e.g.*, calcium regulation of HCN channels promoting persistent  
153 network activity.<sup>35,36</sup>

### 154 **2.2.2 Connectivity and stimulation parameters**

155 NetPyNE is designed to facilitate network design – connectivity rules are flexible and broad in order to  
156 permit ready translation of many different kinds of experimental observations. Different subsets of pre- and  
157 post-synaptic cells can be selected based on a combinations of attributes such as cell type and spatial  
158 location (Fig. 2A-v,vi) Users can then select the target synaptic mechanisms (*e.g.*, AMPA, AMPA/NMDA,  
159 GABA<sub>A</sub>). In the case of multicompartment cells, synapses can be distributed across a list of cell locations  
160 Multiple connectivity functions are available including all-to-all, probabilistic, fixed convergence and fixed  
161 divergence. The connectivity pattern can also be defined by the user via a custom connectivity matrix.  
162 Alternatively, connectivity parameters, typically including weight, probability and delay, can be specified  
163 as a function of pre- and post-synaptic properties. This permits instantiation of biological correlations such  
164 as the dependence of connection delay on distance, or a fall-off in connection probability with distance.

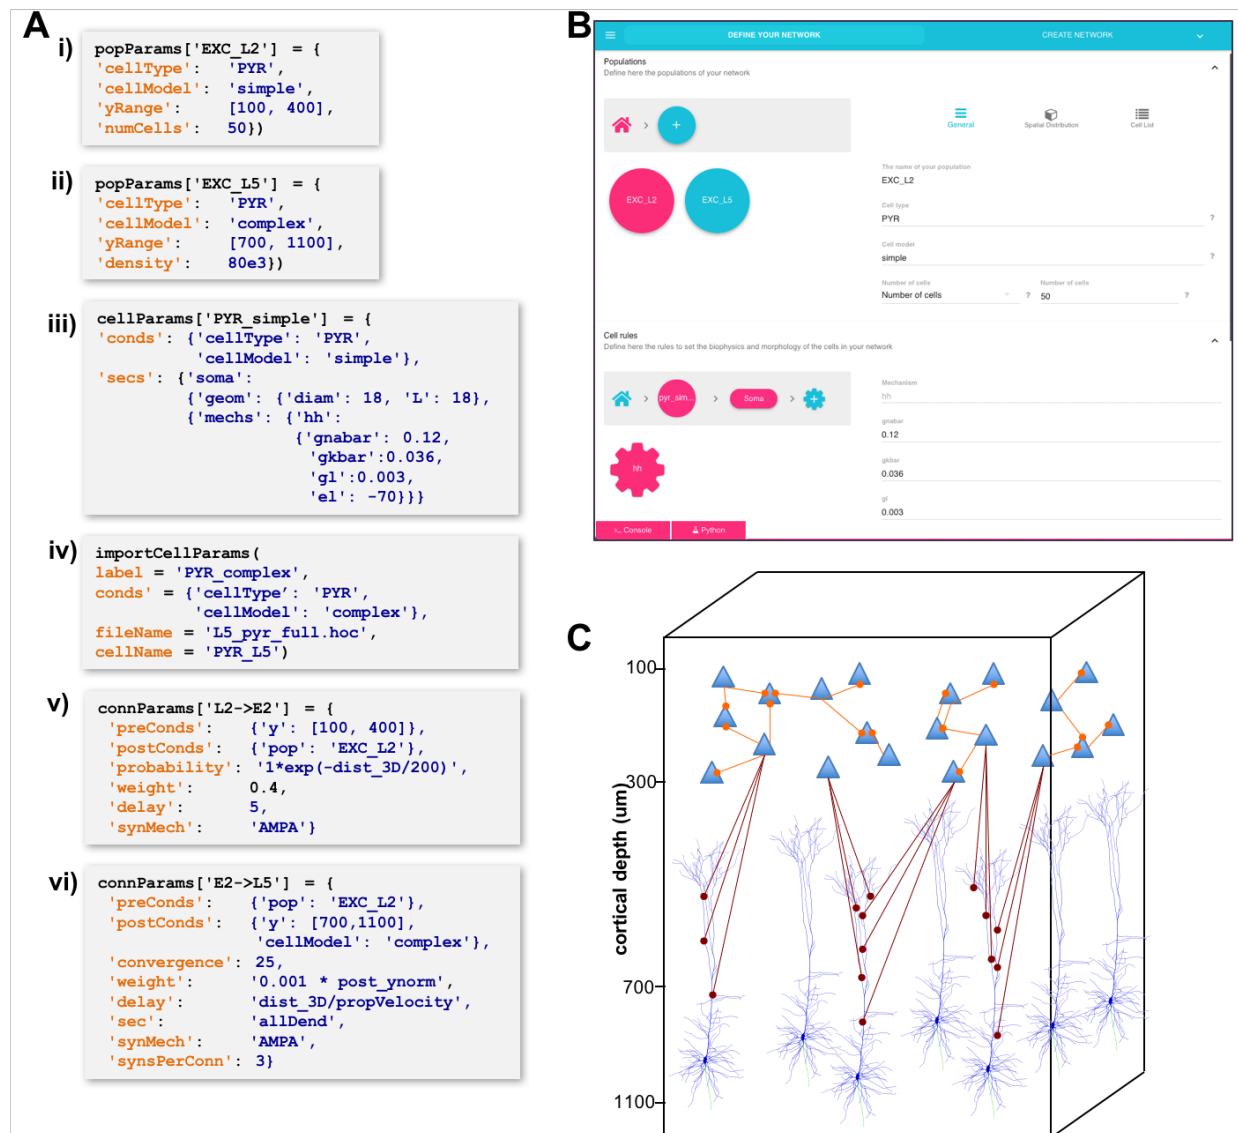

Figure 2: **High-level specification of network parameters.** A) Programmatic parameter specification using standardized declarative JSON-like format. i,ii: specification of two populations iii,iv: cell parameter definitions; v,vi connectivity rules. B) GUI-based parameter specification, showing the definition of populations equivalent to those in panel A. C) Schematic of network model resulting from the specifications in A.

165 Electrical gap junctions and learning mechanisms – including spike-timing dependent plasticity and  
166 reinforcement learning – can also be incorporated.

167 NetPyNE supports specification of subcellular synaptic distribution along dendrites. This allows  
168 synaptic density maps obtained via optogenetic techniques to be directly incorporated in networks. Fig. 3A  
169 left shows the layout for one such technique known as sCRACM (subcellular Channelrhodopsin-2-Assisted  
170 Circuit Mapping).<sup>37</sup> A density map of cell activation measured from the soma is determined through light

171 stimulation at the points on the grid in a slice whose presynaptic boutons from a particular projection, in  
172 this case from thalamus, have been tagged with channelrhodopsin (Fig. 3A). NetPyNE places synapses  
173 randomly based on location correspondence on a dendritic tree which can be either simple or  
174 multicompartmental (Fig. 3B). Here again, the automation of synapse placements permits models of  
175 different complexity to be readily swapped in and out. Depending on the data type and whether one wants  
176 to use averaging, the location maps may be based on 1D, 2D, or 3D tissue coordinates, with the major  
177 *y*-axis reflecting normalized cortical depth (NCD) from pia to white matter. Alternatively, NetPyNE can  
178 define synapse distributions based on categorical information for dendritic subsets: *e.g.*, obliques or spine  
179 densities, or on path distance from the soma, apical nexus or other point. As with the density maps, these  
180 rules will automatically adapt to simplified morphologies. NetPyNE permits visualization of these various  
181 synaptic-distribution choices and cellular models via dendrite-based synapse density plots (Fig. 3C), which  
182 in this case extrapolates from the experimental spatial-based density plot in Fig. 3A.<sup>37–40</sup>

183 Network models often employ artificial stimulation to reproduce the effect of afferent inputs that are  
184 not explicitly modeled, *e.g.*, ascending inputs from thalamus and descending from V2 targeting a V1  
185 network. NetPyNE supports a variety of stimulation sources, including current clamps, random currents,  
186 random spike generators or band-delimited spike or current generators. These can be placed on target cells  
187 using the same flexible, customizable rules previously described for connections. Users can also employ  
188 experimentally recorded input patterns.

### 189 **2.2.3 Simulation configuration**

190 Up to here, we have described the data structures, that defines network parameters: popParams,  
191 cellParams, connParams, *etc.* Next, the user will configure parameters related to a particular simulation  
192 run, such as simulation duration, time-step, parallelization options, *etc.* These parameters will also control  
193 output: variables to plot or to record for graphing – *e.g.*, voltage or calcium concentration from particular  
194 cells, LFP recording options, file save options, and in what format, *etc.* In contrast to network and cell  
195 parameterization, all simulation options have default values so only those being customized are required.

## 196 **2.3 Network instantiation**

197 NetPyNE generates a simulatable NEURON model containing all the elements and properties described by  
198 the user in the rule-based high-level specifications. As described above, declarations may include molecular  
199 processes, cells, connections, stimulators and simulation options. After instantiation, the data structures of  
200 both the original high-level specifications and the resultant network instance can be accessed  
201 programmatically or via GUI.

202 Traditionally, it has been up to the user to provide an easy way to access the components of a  
203 NEURON network model, *e.g.*, the connections or stimulators targeting a cell, the sections in a cell, or the  
204 properties and mechanisms in each section. This feature is absent in many existing models. Hence,  
205 inspecting these models requires calling multiple NEURON functions (*e.g.*, `SectionList.allroots()`,  
206 `SectionList.wholetree()` and `section.psection()`). Other models include some form of indexing for



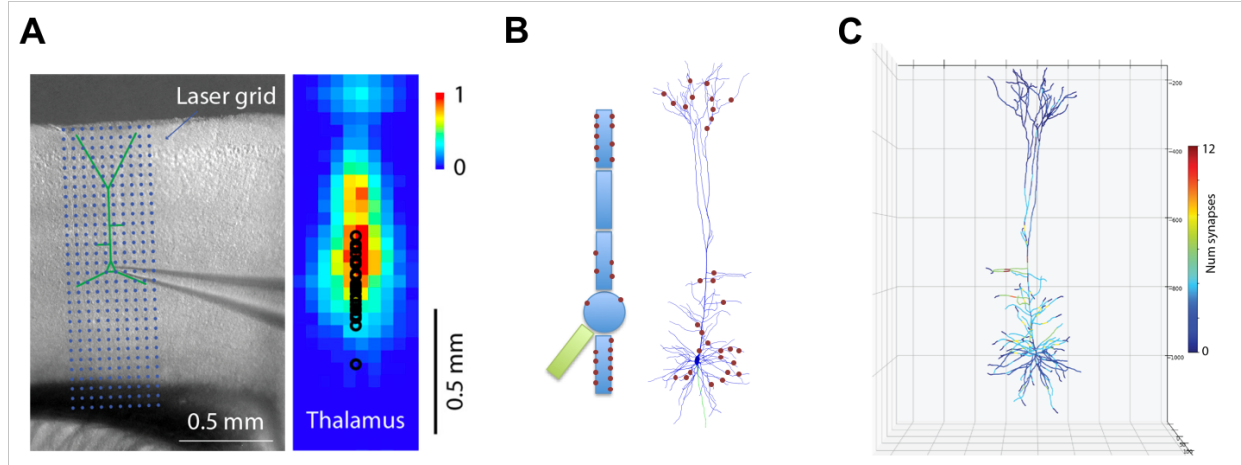

Figure 3: **Specification of dendritic distribution of synapses.** A) Optogenetic data provides synapse density across the 2D grid shown at left.<sup>38</sup> B) Data are imported directly into NetPyNE which automatically calculates synapse location in simplified or full multicompartmental representations of a pyramidal cell. C) Corresponding synaptic density plot generated by NetPyNE.

207 the elements at some scales, but, given this is not enforced, their structure and naming can vary  
208 significantly across models.

209 In contrast, all networks generated by NetPyNE are consistently represented as a nested Python  
210 structure. The root of the instantiated network is the *net* object (Fig. 4). *net* contains a list of cells; each  
211 cell contains lists or dictionaries with its properties, its sections, its stimulators. Each section *sec* contains  
212 dictionaries with its morphology and mechanisms. For example, once the network is instantiated, the  
213 sodium conductance parameter for cell#5 can be accessed as `net.cells[5].secs.soma.mechs.hh.gbar`.  
214 This data structure also includes all the NEURON objects – Sections, NetCons, NetStims, IClamps, *etc.*  
215 embedded hierarchically, and accessible via the `hObj` dictionary key of each element.

## 216 2.4 Parallel simulation

217 Computational needs for running much larger and more complex neural simulations are constantly  
218 increasing as researchers attempt to reproduce fast-growing experimental datasets.<sup>2, 4, 10, 23, 41, 42</sup>  
219 Fortunately, parallelization methods and high performance computing (HPC, supercomputing) resources  
220 are becoming increasingly available to the average user.<sup>30, 43–48</sup>

221 The NEURON simulator provides a *ParallelContext* module, which enables parallelizing the simulation  
222 computations across different nodes. However, this remains a complex process that involves distributing  
223 computations across nodes in a balanced manner, gathering and reassembling simulation results for  
224 post-processing, and ensuring simulation results are replicable and independent of the number of processors  
225 used. Therefore, appropriate and efficient parallelization of network simulations requires design,  
226 implementation and deployment of a variety of techniques, some complex, many obscure, mostly  
227 inaccessible to the average user.<sup>10</sup>

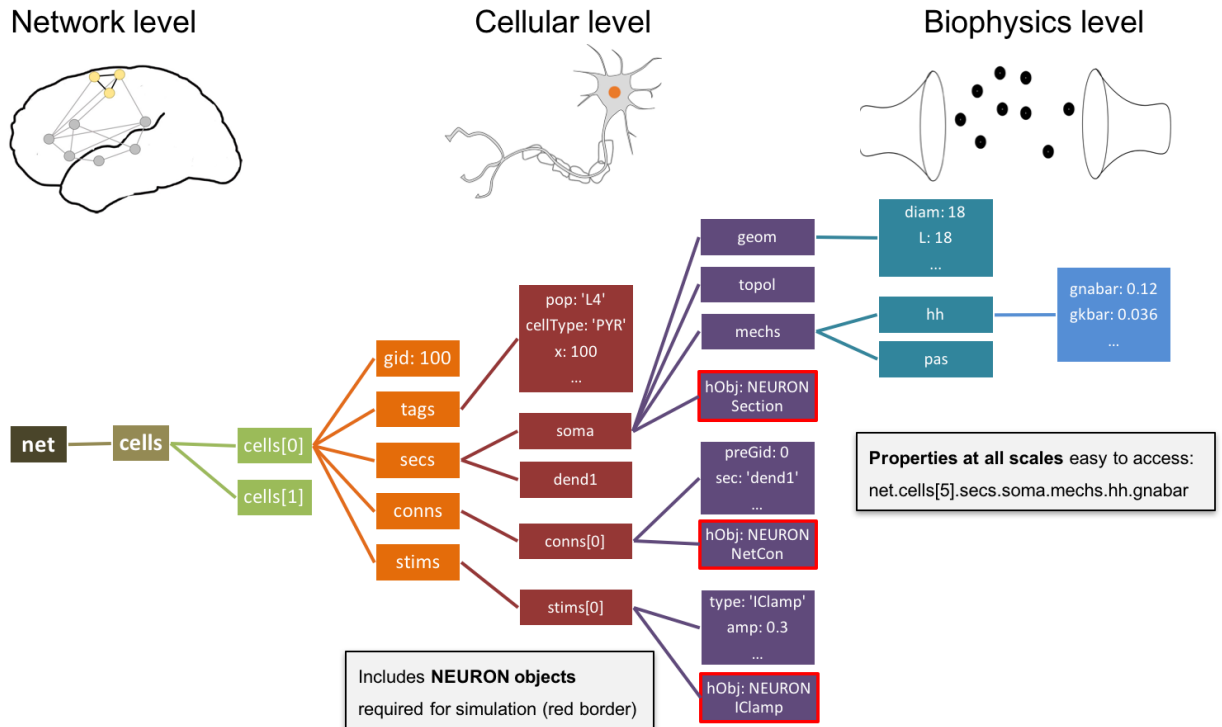

Figure 4: **Instantiated network hierarchical data model.** The instantiated network is represented using a standardized hierarchically-organized Python object that differs from the NetPyNE data structure of Fig. 1. Defined NEURON simulator objects are represented as boxes with red borders and correspond to the object type accessed via `h.objName`. These objects provide direct to all elements, state variables and parameters to be simulated.

228 NetPyNE manages these burdensome tasks so that the user can run take a serial to a parallelized  
 229 simulations with a single function call or mouse click. Cells are distributed across processors using a  
 230 round-robin algorithm, which generally results in balanced computation load on each processor.<sup>10, 49</sup> After  
 231 the simulation has run, NetPyNE gathers in the master all the network metadata (cells, connections, *etc.*)  
 232 and simulation results (spike times, voltage traces, LFP signal, *etc.*) for analysis. As models scale up, it  
 233 becomes unfeasible to store the simulation results on a single centralized master node. NetPyNE offers  
 234 distributed data saving methods that reduce both the runtime memory required and the gathering time.  
 235 Distributed data saving means multiple compute nodes can write information in parallel, either at intervals  
 236 during simulation runtime, or once the simulation is completed. The output files are later merged for  
 237 analysis.

238 Random number generators (RNGs) are often problematic in hand-written parallelized code; careful  
 239 management of seeds is required since use of the same seed or seed-sets across nodes will result in different  
 240 random streams when the number of nodes is changed. Since random values are used to generate cell  
 241 locations, connectivity properties, spike times of driving inputs, *etc.*, inconsistent streams will cause a  
 242 simulation to produce different results when going from serial to parallel or when changing the number of  
 243 nodes. In NetPyNE, RNGs are initialized based on seed values created from associated pre- and

244 post-synaptic cell global identifiers (gids) which ensures simulation stable results across different numbers  
245 of cores. Specific RNG streams are associated to *purposive* seeds (*e.g.*, connectivity or locations) and to a  
246 global seed, allowing different random, but replicable, networks to be run with change of the single global  
247 seed. Similarly, manipulation of *purposive* seeds can be used to run, for example, a network with identical  
248 wiring but different random driving inputs.

249 We previously performed parallelization performance analyses that demonstrated run time scales  
250 appropriately as a function of number of cells (tested up to 100,000) and compute nodes (tested up to  
251 512).<sup>10</sup> Simulations were developed and executed using NetPyNE and NEURON on the XSEDE Comet  
252 supercomputer via the Neuroscience Gateway<sup>30</sup> ([www.nsgportal.org](http://www.nsgportal.org)). The Neuroscience Gateway, which  
253 provides neuroscientists with free and easy access to supercomputers, includes NetPyNE as one of the tools  
254 available via their web portal. Larger-scale models – including the M1 model with 10k multicompartment  
255 neurons and 30 million synapses<sup>23</sup> and the thalamocortical model with over 80k point neurons and 300  
256 million synapses<sup>24,50</sup> – have been simulated in both the XSEDE Comet supercomputer and Google Cloud  
257 supercomputers. Run time to simulate one second of the multicompartment-neuron network required 47  
258 minutes on 48 cores, and 4 minutes on 128 cores for the point-neuron network.

## 259 2.5 Analysis of network and simulation output

260 To extract conclusions from neural simulations it is necessary to use further tools to process and present  
261 the large amounts of raw data generated. NetPyNE includes built-in implementations of a wide range of  
262 visualization and analysis functions commonly used in neuroscience (Fig. 5). All analysis functions include  
263 options to customize the desired output. Functions to visualize and analyze network structure are available  
264 without a simulation run: **1.** intracellular and extracellular RxD species concentration in a 2D region;  
265 **2.** matrix or stacked bar plot of connectivity; **3.** 2D representation of cell locations and connections; and  
266 **4.** 3D cell morphology with color-coded variable (*e.g.*, number of synapses per segment). After a simulation  
267 run, one can visualize and analyze simulation output: **1.** time-resolved traces of any recorded cell variable  
268 (*e.g.*, voltage, synaptic current or ion concentration); **2.** relative and absolute amplitudes of post-synaptic  
269 potentials; **3.** spiking statistics (boxplot) of rate, the interspike interval coefficient of variation (ISI CV)  
270 and synchrony;<sup>51</sup> **4.** power spectral density of firing rates; and **5.** information theory measures, including  
271 normalized transfer entropy and Granger causality.

272 A major feature of our tool is the ability to place extracellular electrodes to record LFPs at any  
273 arbitrary 3D locations within the network, similar to the approach offered by the LFPy<sup>52</sup> and LFPsim<sup>53</sup>  
274 add-ons to NEURON. The LFP signal at each electrode is obtained by summing the extracellular potential  
275 contributed by each neuronal segment, calculated using the "line source approximation" and assuming an  
276 Ohmic medium with conductivity.<sup>53,54</sup> The user can then plot the location of each electrode, together with  
277 the recorded LFP signal and its power spectral density and spectrogram (Fig. 6). The ability to record and  
278 analyze LFPs facilitates reproducing experimental datasets that include this commonly used measure.<sup>54</sup>

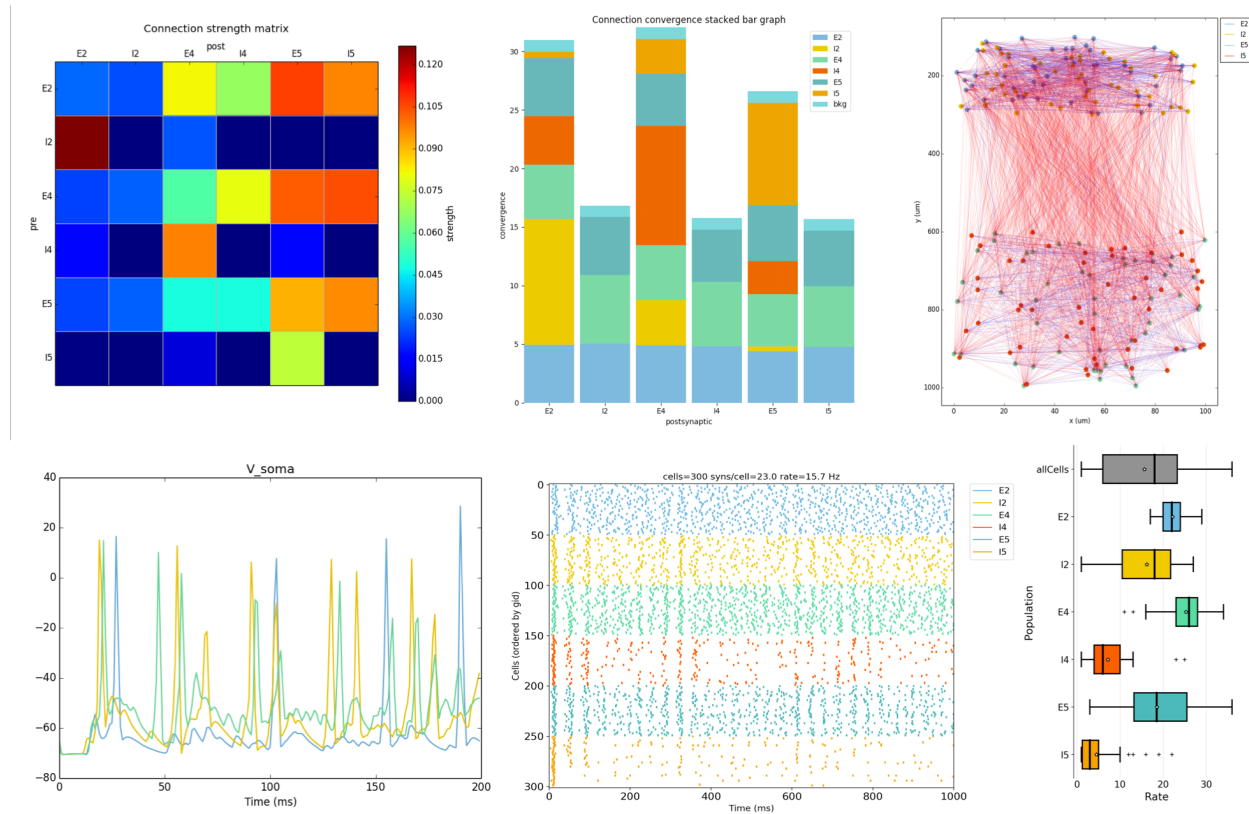

Figure 5: NetPyNE visualization and analysis plots for a simple 3-layer network example A) Connectivity matrix, B) stacked bar graph, C) 2D representation of cells and connections, D) voltage traces of 3 cells, E) raster plot, F) population firing rate statistics (boxplot).

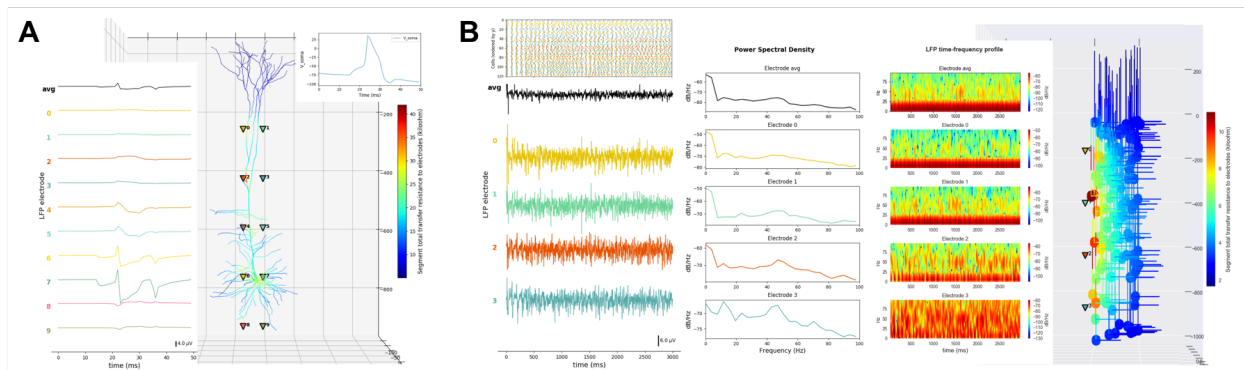

Figure 6: LFP recording and analysis. A) LFP signals (left) from 10 extracellular recording electrodes located around a morphologically detailed cell (right) producing a single action potential (top-right). B) LFP signals, PSDs and spectrograms (left and center) from 4 extracellular recording electrodes located at different depths of a network of 120 5-compartment neurons (right) producing oscillatory activity (top-left).

## 279 2.6 Data saving and exporting

280 NetPyNE permits saving and loading of all model components and results separately or in combination:  
 281 high-level specifications, network instance, simulation configuration, simulation data, and simulation

282 analysis results. Saving network instances enables loading a specific saved network with all explicit cells  
283 and connections, without the need to re-generate these from the high-level connectivity rules. NetPyNE  
284 supports several standard file formats: pickle, JSON, MAT, and HDF5. The use of common file formats  
285 allows network structure and simulation results to be easily analyzed using other tools such as MATLAB  
286 or Python Pandas.

287 Network instances can also be exported to or imported from NeuroML,<sup>14</sup> a standard declarative  
288 format for neural models, and SONATA (<https://github.com/AllenInstitute/sonata>), a format standard for  
289 neural models proposed by the Blue Brain Project and Allen Institute for Brain Science. These formats are  
290 also supported by other simulation tools, so that models developed using NetPyNE can be exported,  
291 explored and simulated in other tools including Brian,<sup>55</sup> MOOSE,<sup>56,57</sup> PyNN,<sup>17</sup> Bionet<sup>20</sup> or Open Source  
292 Brain.<sup>29</sup> Similarly simulations from these other tools can be imported into NetPyNE. This feature also  
293 enables any NetPyNE model to be visualized via the Open Source Brain portal, and permits a NeuroML  
294 model hosted on the portal to be parallelized across multiple cores (*e.g.*, on HPC) using NetPyNE.

295 Long simulations of large networks take a long time to run. Due to memory and disk constraints, it is  
296 not practical to save all state variables from all cells during a run, particularly when including signaling  
297 concentrations at many locations when using the reaction-diffusion module. Therefore, NetPyNE includes  
298 the option of recreating single cell activity in the context of spike inputs previously recorded from a  
299 network run. These follow-up simulations do not typically require an HPC since they are only running the  
300 one cell. The user selects a time period, a cell number, and a set of state variables to record or graph.

## 301 **2.7 Parameter optimization and exploration via batch simulations**

302 Parameter optimization involves finding sets of parameters that lead to a desired output in a model. This  
303 process is often required since both single neuron and network models include many not-fully constrained  
304 parameters that can be modified within a known biological range of values. Network dynamics can be  
305 highly sensitive, with small parameter variations leading to large changes. This then requires searching  
306 within complex multidimensional spaces to match experimental data, with degeneracy such that multiple  
307 parameter sets may produce matching activity patterns.<sup>58–60</sup> A related concept is that of parameter  
308 exploration. Once a model is tuned to reproduce biological features, it is common to explore individual  
309 parameters to understand their relation to particular model features, *e.g.*, how synaptic weights affect  
310 network oscillations,<sup>61</sup> or the effect of different pharmacological treatments on pathological symptoms.<sup>26,62</sup>

311 Many different approaches exist to perform parameter optimization and exploration. Manual tuning  
312 usually requires expertise and a great deal of patience.<sup>63,64</sup> Therefore, NetPyNE provides built-in support  
313 for several automated methods that have been successfully applied to both single cell and network  
314 optimization: grid-search and various types of evolutionary algorithms (EAs).<sup>2,65–70</sup> Grid search refers to  
315 evaluating combinations on a fixed set of values for a chosen set of parameters, resulting in gridded  
316 sampling of the multidimensional parameter space. EAs search parameter space more widely and are  
317 computationally efficient when handling complex, non-smooth, high-dimensional parameter spaces.<sup>64</sup> They  
318 effectively follow the principles of biological evolution: here a population of models evolves by changing  
319 parameters in a way that emulates crossover events and mutation over generations until individuals reach a

320 desired fitness level.

321 NetPyNE provides an automated parameter optimization and exploration framework specifically  
322 tailored to multiscale biophysically-detailed models. Our tool facilitates the multiple steps required:  
323 **1.** parameterizing the model and selecting appropriate value ranges; **2.** providing a fitness functions;  
324 **3.** customizing the optimization/exploration algorithm options; **4.** running the batch simulations; and  
325 **5.** managing and analyzing batch simulation parameters and outputs. To facilitate parameter selection, all  
326 of the network specifications are available to the user via the NetPyNE declarative data structure – from  
327 molecular concentrations and ionic channel conductances to long-range input firing rates – freeing the user  
328 from having to identify parameters or state variables at the simulator level.

329 Both parameter optimization and exploration involve running many instances of the network with  
330 different parameter values, and thus typically require parallelization. For these purposes, NetPyNE  
331 parallelization is implemented at two levels: **1.** simulation level – cell computations distributed across  
332 nodes as described above; and **2.** batch level – many simulations with different parameters executed in  
333 parallel.<sup>65</sup> NetPyNE includes predefined execution setups to automatically run parallelized batch  
334 simulations on different environments: **1.** multiprocessor local machines or servers via standard message  
335 passing interface (MPI) support; **2.** the Neuroscience Gateway (NSG) online portal, which includes  
336 compressing the files and uploading a zip file via RESTful services; **3.** HPC systems (supercomputers) that  
337 employ job queuing systems such as PBS Torque or SLURM (*e.g.*, Google Cloud Computing HPCs). Users  
338 will be able to select the most suitable environment setup and customize options if necessary, including any  
339 optimization algorithm metaparameters such as population size, mutation rate for EAs. A single high-level  
340 command will then take care of launching the batch simulations to optimize or to explore the model.

## 341 **2.8 Graphical User Interface (GUI)**

342 The GUI enables users to more intuitively access NetPyNE functionalities. It divides the workflow into two  
343 tabs: network definition and network exploration, simulation and analysis. From the first tab it is possible  
344 to define – or import from various formats – the high-level network parameters/rules and simulation  
345 configuration (Fig. 2B). Parameter specification is greatly facilitated by having clearly structured and  
346 labeled sets of parameters, graphics to represent different components, drop-down lists, autocomplete forms  
347 and automated suggestions. The GUI also includes an interactive Python console and full bidirectional  
348 synchronization with the underlying Python-based model – parameters changed via the Python console  
349 will be reflected in the GUI, and vice versa. In the second tab the user can interactively visualize the  
350 instantiated network in 3D, run parallel simulations and display all the available plots to analyze the  
351 network and simulation results. An example of a multiscale model visualized, simulated and analyzed using  
352 the GUI is shown in Fig. 7. The code and further details of this example are available at  
353 [https://github.com/Neurosim-lab/netpyne/tree/development/examples/rxd\\_net](https://github.com/Neurosim-lab/netpyne/tree/development/examples/rxd_net).

354 The GUI is particularly useful for beginners, students or non-computational researchers who can  
355 rapidly build networks without knowledge of coding and without learning NetPyNE’s declarative syntax.  
356 From there, they can simulate and explore multiscale subcellular, cellular and network models with varying  
357 degrees of complexity, from integrate-and-fire up to large-scale simulations that require HPCs. The GUI is

358 also useful for modelers, who can easily prototype new models graphically and later extend the model  
359 programmatically using automatically generated Python scripts. Finally, the GUI is useful – independently  
360 of expertise level – to explore and visualize existing models developed by oneself, developed by other users  
361 programmatically, or imported from other simulators. Understanding unfamiliar models is easier if users  
362 can navigate through all the high-level parameters in a structured manner and visualize the instantiated  
363 network structure, instead of just looking at the model definition code.<sup>71</sup>

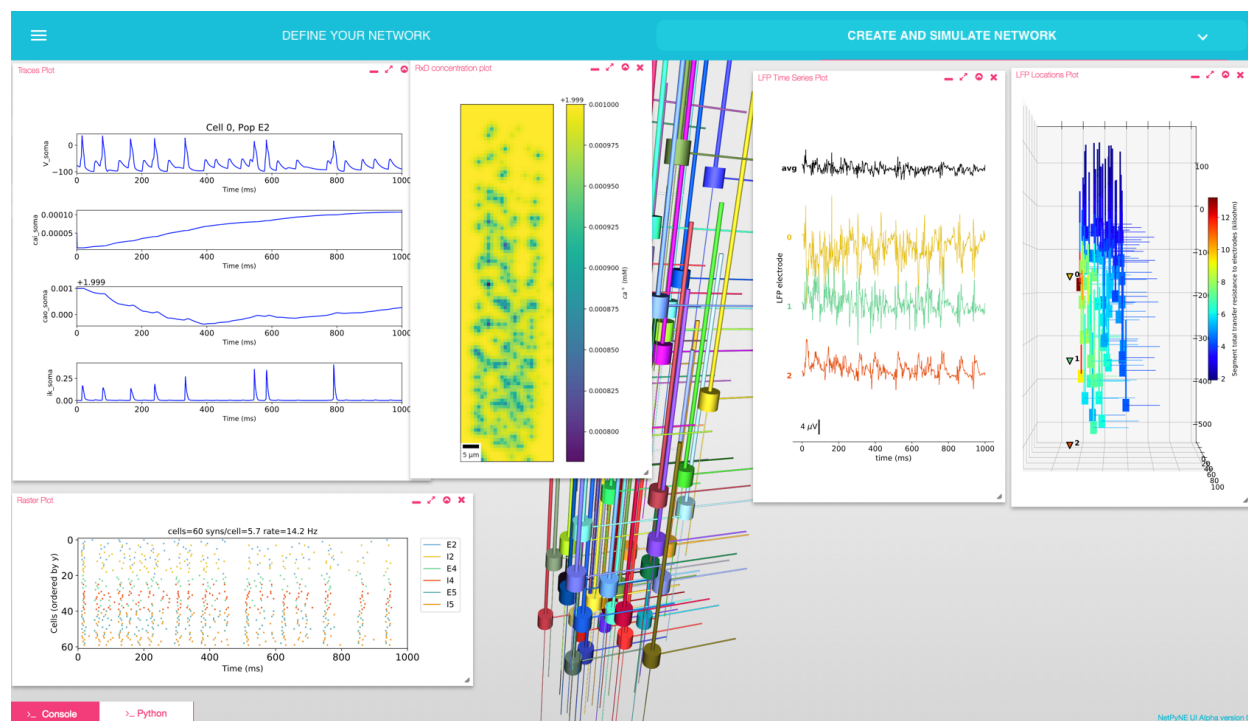

Figure 7: NetPyNE graphical user interface (GUI) showing a multiscale model. Background shows 3D representation of example network with 6 populations of multi-channel multi-compartment neurons (background); plots from left to right: cell traces (voltage, intracellular and extracellular calcium concentration, and potassium current); raster plot; extracellular potassium concentration; LFP signals recorded from 3 electrodes; and 3D location of the LFP electrodes within network.

## 364 2.9 Application examples

365 Our recent model of primary motor cortex (M1) microcircuits<sup>23,26,66</sup> constitutes an illustrative example  
366 where NetPyNE enabled the integration of complex experimental data at multiple scales: it simulates over  
367 10,000 biophysically detailed neurons and 30 million synaptic connections. Neuron densities, classes,  
368 morphology and biophysics, and connectivity at the long-range, local and dendritic scale were derived from  
369 published experimental data.<sup>38–40,72,73,73–79</sup> Results yielded insights into circuit information pathways,  
370 oscillatory coding mechanisms and the role of HCN in modulating corticospinal output.<sup>23</sup> A scaled down  
371 version (180 neurons) of the M1 model is illustrated Fig. 8.

372 Several models published in other languages have been converted into NetPyNE to increase their

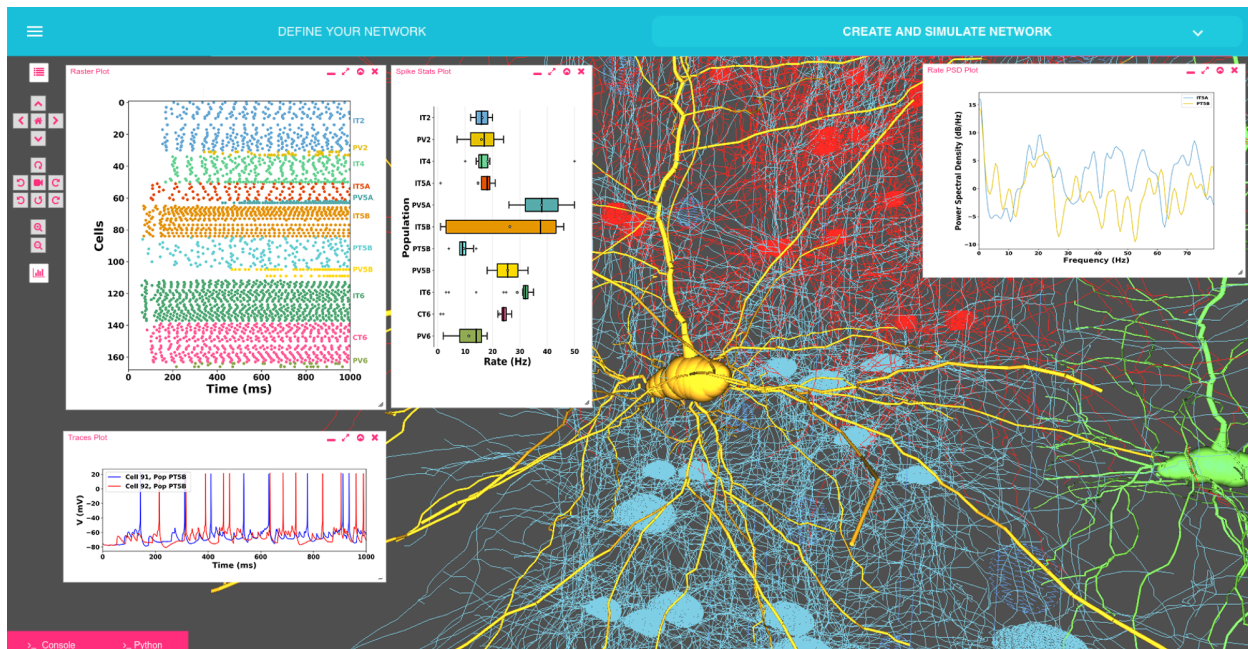

Figure 8: **Model of M1 microcircuits developed using NetPyNE (scaled down version).** NetPyNE GUI showing 3D representation of M1 network (background), raster plot and population firing rate statistics (top left), voltage traces (bottom left) and firing rate power spectral density (top right).

usability and flexibility. These include models of cortical circuits exploring EEG/MEG signals (https://hnn.brown.edu/),<sup>27,28</sup> interlaminar flow of activity<sup>24,50</sup> (Fig. 9A) and epileptic activity<sup>62</sup> (Fig. 9B); a dentate gyrus network<sup>80,81</sup> (Fig. 9C); and CA1 microcircuits<sup>82,83</sup> (Fig. 9D). As a measure of how compact the model definition is, we compared the number of source code lines (excluding comments, blank lines, cell template files and mod files) of the original and NetPyNE implementations (see Table 2.9).

| Model description                              | Original language | Original num lines | NetPyNE num lines |
|------------------------------------------------|-------------------|--------------------|-------------------|
| Dentate gyrus <sup>80</sup>                    | NEURON/hoc        | 1029               | 261               |
| CA1 microcircuits <sup>82</sup>                | NEURON/hoc        | 642                | 306               |
| Epilepsy in thalamocortex <sup>62</sup>        | NEURON/hoc        | 556                | 201               |
| EEG/MEG in cortex (HNN model) <sup>27,28</sup> | NEURON/Python     | 2288               | 924               |
| Motor cortex with RL <sup>65</sup>             | NEURON/Python     | 1171               | 362               |
| Cortical microcircuits <sup>50</sup>           | PyNEST            | 689                | 198               |

### 3 Discussion

NetPyNE is a high-level Python interface to the NEURON simulator that facilitates the definition, parallel simulation, optimization and analysis of data-driven brain circuit models. NetPyNE provides a systematic,



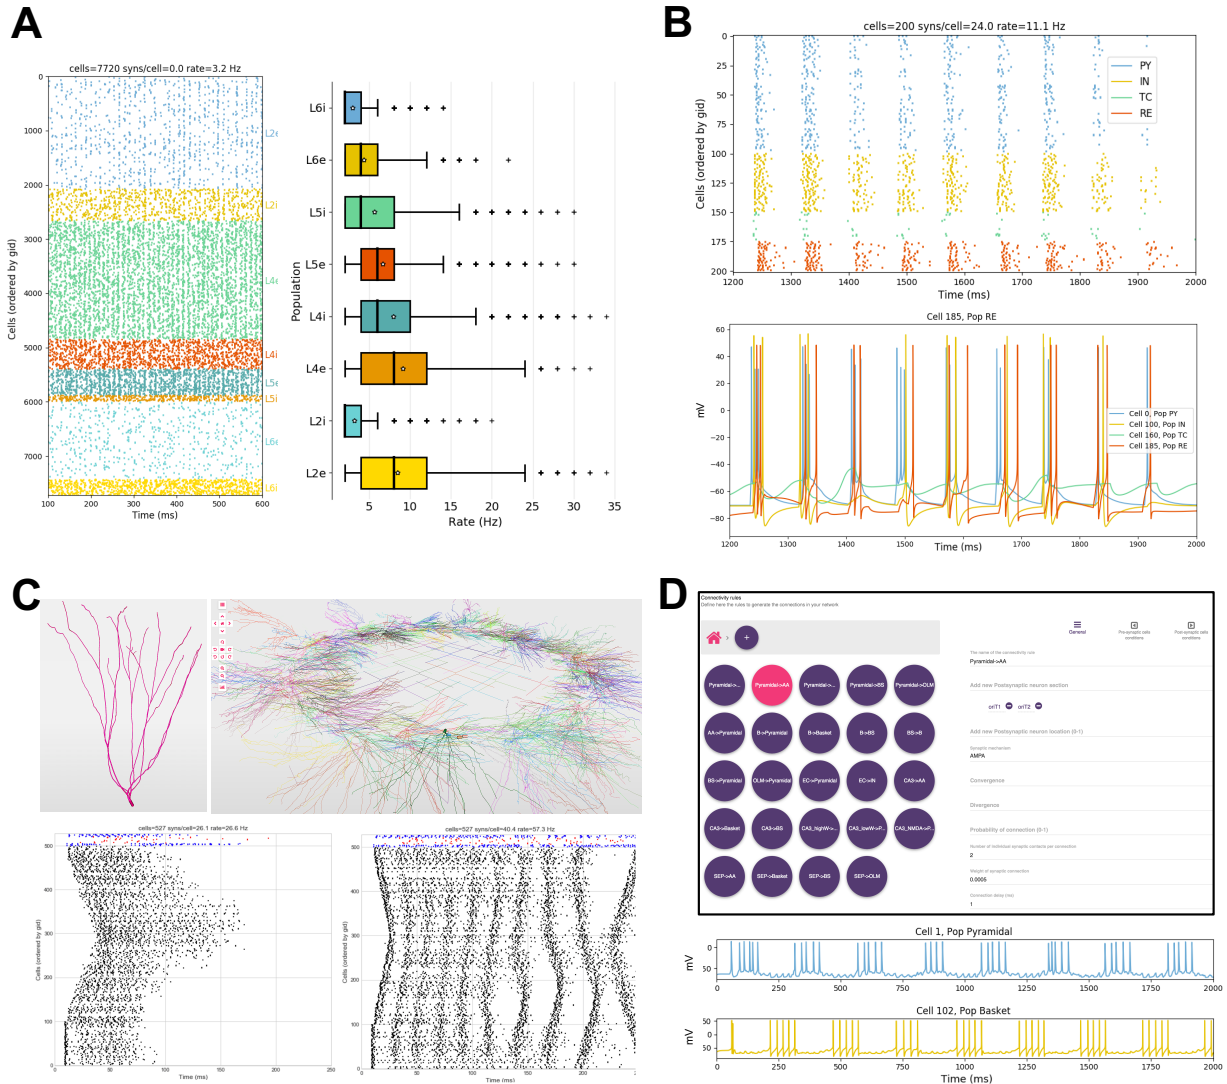

Figure 9: **Published models converted to NetPyNE.** All figures were generated using the NetPyNE version of the models. A) Raster plot and boxplot statistics of the Potjans and Diesmann thalamocortical network originally implemented in NEST.<sup>24,50</sup> B) Raster plot and voltage traces of a thalamocortical network exhibiting epileptic activity originally implemented in NEURON/hoc.<sup>62</sup> C) 3D representation of the cell types and network topology, and raster plots of dentate gyrus model originally implemented in NEURON/hoc.<sup>80,81</sup> D) Connectivity rules (top) and voltage traces of 2 cell types (bottom) of a hippocampal CA1 model originally implemented in NEURON/hoc.<sup>82,83</sup>

384 standardized approach to biologically-detailed multiscale modeling. Its broad scope offers users the option  
 385 to evaluate neural dynamics from a variety of scale perspectives: *e.g.*, **1.** network simulation in context of  
 386 the brain as an organ – *i.e.*, with extracellular space included; **2.** focus at the cellular level in the context of  
 387 the network; **3.** evaluate detailed spine and dendrite modeling in the context of the whole cell *and* the  
 388 network, *etc.* Swapping focus back-and-forth across scales allows the investigator to understand scale  
 389 integration in a way that cannot be done in the experimental preparation. In this way, multiscale modeling

390 complements experimentation by combining and making interpretable previously incommensurable  
391 datasets. *In silico* models developed with NetPyNE can serve as testbeds that can be probed extensively  
392 and precisely in ways that parallel experimentation to make testable predictions. Simulation can also go  
393 beyond the capabilities of physical experimentation to build comprehension and develop novel theoretical  
394 constructs.<sup>2,4,41,84</sup>

395 To ensure accessibility to a wide range of researchers, including modelers, students and  
396 experimentalists, NetPyNE combines many of the modeling workflow features under a single framework  
397 with both a programmatic and graphical interface. The GUI provides an intuitive way to learn to use the  
398 tool and explore all the different components and features interactively. Exporting the generated network  
399 to a Python script enables more advanced users to extend the model programmatically.

### 400 3.1 Multiscale specifications using a declarative language

401 By providing support for NEURON's intracellular and extracellular reaction-diffusion module (RxD),<sup>21,22</sup>  
402 NetPyNE helps to couple molecular-level chemophysiology – historically neglected in computational  
403 neuroscience – to the classical electrophysiology at subcellular, cellular and network scales. RxD allows the  
404 user to specify and simulate the diffusion of molecules (*e.g.*, calcium, potassium or IP3) intracellularly,  
405 subcellularly (by including organelles such as endoplasmic reticulum and mitochondria), and extracellularly  
406 in the context of signaling and enzymatic processing – *e.g.*, metabolism, phosphorylation, buffering, second  
407 messenger cascades. This relates the scale of molecular interactions with that of cells and networks.

408 NetPyNE rules allow users to not only define connections at the cell-to-cell level, but also to  
409 compactly express highly specific patterns of the subcellular distribution of synapses, *e.g.*, depending on  
410 the neurite cortical depth or path distance from soma. Such distinct innervation patterns have been shown  
411 to depend on brain region, cell type and location and are likely to subserve important information  
412 processing functions and have effects at multiple scales.<sup>37,39,85,86</sup> Some simulation tools (GENESIS,<sup>56</sup>  
413 MOOSE, PyNN<sup>17</sup> and neuroConstruct<sup>16</sup>) include basic dendritic level connectivity features, and others  
414 (BioNet<sup>20</sup>) allow for Python functions that describe arbitrarily complex synapse distribution and  
415 connectivity rules. However, NetPyNE is unique in facilitating the description of these synaptic  
416 distribution patterns via flexible high-level declarations that require no algorithmic coding.

417 NetPyNE's high-level language has advantages over procedural description in that it provides a  
418 human-readable, declarative format, accompanied by a parallel graphical representation, making models  
419 easier to read, modify, share and reuse. Other simulation tools such as PyNN, NEST, Brian or BioNet  
420 include high-level specifications in the context of the underlying procedural language used for all aspects of  
421 model instantiation, running and initial analysis. Procedural languages require ordering by the logic of  
422 execution rather than the logic of the conceptual model. Since the NetPyNE declarative format is order  
423 free, it can be cleanly organized by scale, by cell type, or by region at the discretion of the user. This  
424 declarative description can then be stored in standardized formats that can be readily translated into  
425 shareable data formats for use with other simulators. High-level specifications are translated into a network  
426 instance using previously tested and debugged implementations. Compared to creating these elements  
427 directly via procedural coding (in Python/NEURON), our approach reduces the chances of coding bugs,

428 replicability issues and inefficiencies,

429 The trade-off is that users of a declarative language are constrained to express inputs according to the  
430 standardized formats provided, offering somewhat less flexibility compared to a procedural language.  
431 However, NetPyNE has been designed so that many fields are agglutinative, allowing multiple descriptors  
432 to be provided together to hone in on particular subsets of cells, subcells or subnetworks, *e.g.*, cells of a  
433 certain type within a given spatial region. Additionally, users can add procedural NEURON/Python code  
434 between the instantiation and simulation stages of NetPyNE in order to customize or add non-supported  
435 features to the model.

436 Developers of several applications and languages, including NeuroML, PyNN, SONATA and NetPyNE,  
437 are working together to ensure interoperability between their different formats. NeuroML<sup>14</sup> is a widely-used  
438 model specification language for computational neuroscience which can store instantiated networks through  
439 an explicit list of populations of cells and their connections, without higher level specification rules. We are  
440 collaborating with the NeuroML developers to incorporate high-level specifications similar to those used in  
441 NetPyNE, *e.g.*, compact connectivity rules (see [github.com/NeuroML/NeuroMLlite](https://github.com/NeuroML/NeuroMLlite)). The hope is that  
442 these compact network descriptions become a standard in the field so that they can be used to produce  
443 identical network instances across different simulators. To further promote standardization and  
444 interoperability, we and other groups working on large-scale networks founded the INCF Special Interest  
445 Group on “Standardized Representations of Network Structures” ([www.incf.org/activities/standards-and-](http://www.incf.org/activities/standards-and-best-practices/incf-special-interest-groups/incf-sig-on-standardised)  
446 [best-practices/incf-special-interest-groups/incf-sig-on-standardised](http://www.incf.org/activities/standards-and-best-practices/incf-special-interest-groups/incf-sig-on-standardised)).

## 447 **3.2 Integrated parameter optimization**

448 A major difficulty in building complex models is optimizing its many parameters within biological  
449 constraints to reproduce experimental results.<sup>63,64</sup> Multiple tools are available to fit detailed single cell  
450 models to electrophysiological data: BluePyOpt,<sup>87</sup> Optimizer,<sup>88</sup> Pypet<sup>89</sup> or NeuroTune.<sup>90</sup> However, these  
451 optimizers work within a single scale rather than optimizing across scales to study complex cells in complex  
452 circuits. NetPyNE provides a parameter optimization framework designed specifically to tackle this  
453 problem, thus enabling and encouraging the exploration of interactions across scales. It also closely  
454 integrates with the simulator rather than being a standalone optimizer, which would require expertise to  
455 interface properly. NetPyNE offers multiple optimization methods, including evolutionary algorithms,  
456 which are computationally efficient for handling the non-smooth high-dimensional parameter spaces found  
457 in this domain.<sup>63,64,91</sup>

## 458 **3.3 Use of NetPyNE in education**

459 In addition to the tool itself, we have developed detailed online documentation, step-by-step tutorials  
460 ([www.netpyne.org](http://www.netpyne.org)), and example models. The code has been released as open source  
461 ([github.com/Neurosim-lab/netpyne](https://github.com/Neurosim-lab/netpyne)). Ongoing support is provided via a mailing list (with 50 subscribed  
462 users) and active Q&A forums (150 posts and over 5,000 views in the first year):  
463 [www.netpyne.org/ mailing](http://www.netpyne.org/ mailing), [www.netpyne.org/ forum](http://www.netpyne.org/ forum) and [netpyne.org/ neuron-forum](http://netpyne.org/ neuron-forum). Users have been able

464 to quickly learn to build, simulate and explore models that illustrate fundamental neuroscience concepts,  
465 making NetPyNE a useful tool to train students. To disseminate the tool we have also provided NetPyNE  
466 training at conference workshops and tutorials, summer schools and university courses. Several labs are  
467 beginning to use NetPyNE to train students and postdocs.

### 468 **3.4 Use of NetPyNE in research**

469 Models being developed in NetPyNE cover a wide range of regions including thalamus, sensory and motor  
470 cortices,<sup>23,26</sup> claustrum,<sup>25</sup> striatum, cerebellum, hippocampus. Application areas being explored include  
471 schizophrenia, epilepsy, transcranial magnetic stimulation (TMS), and electro- and  
472 magneto-encephalography (EEG/MEG) signals.<sup>92</sup> A full list of areas and applications is available at  
473 [www.netpyne.org/models](http://www.netpyne.org/models).

474 Tools such as NetPyNE that provide insights into multiscale interactions are particularly important  
475 for the understanding of brain disorders, which always involve interactions across spatial and temporal  
476 scale domains.<sup>93</sup> Development of novel biomarkers, increased segregation of disease subtypes, new  
477 treatments, and personalized treatments, all require that details of molecular, anatomical, functional, and  
478 dynamic organization that have been demonstrated in isolation be related to one another. Simulations and  
479 analyses developed in NetPyNE provide a way to link these scales, from the molecular processes of  
480 pharmacology, to cell biophysics, electrophysiology, neural dynamics, population oscillations, EEG/MEG  
481 signals and behavioral measures.

## 482 **4 Methods**

### 483 **4.1 Overview of tool components and workflow**

484 NetPyNE is implemented as a Python package that acts as a high-level interface to the NEURON  
485 simulator. The package is divided into several subpackages, which roughly match the components depicted  
486 in the workflow diagram in Fig. 1. The `specs` subpackage contains modules related to definition of  
487 high-level specifications. The `sim` subpackage contains modules related to running the simulation. It also  
488 serves as a shared container that encapsulates and provides easy access to the remaining subpackages,  
489 including methods to build the network or analyze the output, and the actual instantiated network and cell  
490 objects. From the user perspective, the basic modeling workflow is divided into three steps: defining the  
491 network parameters (populations, cell rules, connectivity rules, *etc*) inside an object of the class  
492 `specs.NetParams`; setting the simulation configuration options (run time, integration interval, recording  
493 option, *etc*) inside an object of the class `specs.SimConfig`; and passing these two objects to a wrapper  
494 function (`sim.createSimulateAnalyze()`) that takes care of creating the network, running the simulation  
495 and analyzing the output.

## 496 4.2 Network instantiation

497 The following standard sequence of events are executed internally to instantiate a network from the  
498 high-level specifications in the `netParams` object: **1.** create a `Network` object and add to it a set of  
499 `Population` and `Cell` objects based on `parameters`; **2.** set cell properties (morphology and biophysics)  
500 based on `cellParams` parameters (checking which cells match the conditions of each rule); **3.** create  
501 molecular-level `RxD` objects based on `rxParams` parameters; **4.** add stimulation (`IClamps`, `NetStims`, *etc*)  
502 to the cells based on `stimSourceParams` and `stimTargetParams` parameters; and **5.** create a set of  
503 connections based on `connParams` and `subConnParams` parameters (checking which presynaptic and  
504 postsynaptic cells match the conn rule conditions), with the synaptic parameters specified in  
505 `synMechParams`. After this process is completed all the resulting `NEURON` objects will be contained and  
506 easily accessible within a hierarchical Python structure (object `sim.net` of the class `Network`) as depicted  
507 in Fig. 4.

508 The network building task is further complicated by the need to implement parallel `NEURON`  
509 simulations in an efficient and replicable manner, independent of the number of processors employed.  
510 Random number generators (RNGs) are used in several steps of the building process, including cell  
511 locations, connectivity properties and the spike times of input stimuli (*e.g.*, `NetStims`). To ensure random  
512 independent streams that can be replicated deterministically when running on different number of cores we  
513 employed `NEURON`'s `Random123` RNG from the `h.Random` class. This versatile cryptographic quality  
514 RNG<sup>94</sup> is initialized using three seed values, which, in our case, will include a global seed value and two  
515 other values related to unique properties of the cells involved, *e.g.*, for probabilistic connections, the gids of  
516 the pre- and post-synaptic cells.

517 To run `NEURON` parallel simulations `NetPyNE` employs a `pc` object of the class  
518 `h.ParallelContext()`, which is created when the `sim` object is first initialized. During the creation of the  
519 network, the cells are registered via the `pc` methods to enable exchange and recording of spikes across  
520 compute nodes. Prior to running the simulation, global variables, such as temperature or initial voltages  
521 are initialized, and the recording of any traces (*e.g.*, cell voltages) and LFP is set up by creating  
522 `h.Vector()` containers and calling the recording methods. After running the parallel simulation via  
523 `pc.solve()`, data (cells, connections, spike times, recorded traces, LFPs, *etc*) is gathered into the master  
524 node from all compute nodes using the `pc.py_alltoall()` method. Alternatively, distributed saving  
525 enables writing the output of each node to file and combining these files after the simulation has ended.  
526 After gathering, the built-in analysis functions have direct access to all the network and simulation output  
527 data via `sim.net.allCells` and `sim.allSimData`.

## 528 4.3 Importing and exporting

529 `NetPyNE` enables importing existing cells in hoc or Python, including both templates/classes and  
530 instantiated cells. To do this `NetPyNE` internally runs the hoc or Python cell model, extracts all the  
531 relevant cell parameters (morphology, mechanisms, point processes, synapses, *etc*) and stores them in the  
532 `NetPyNE` JSON-like format used for high-level specifications. The hoc or Python cell model is then

533 completely removed from memory so later simulations are not affected.

534 Importing and exporting to other formats such as NeuroML or SONATA requires mapping the  
535 different model components across formats. To ensure validity of the conversion we have compared  
536 simulation outputs from each tool, or converted back to the original format and compared to the original  
537 model. Tests on mappings between NetPyNE and NeuroML can be found at  
538 <https://github.com/OpenSourceBrain/NetPyNEShowcase>.

## 539 4.4 Batch simulations

540 Exploring or fitting model parameters typically involves running many simulations with small variations in  
541 some parameters. NetPyNE facilitates this process by automatically modifying these parameters and  
542 running all the simulations based on a set of high-level instructions provided by the user. The two fitting  
543 approaches – grid search and evolutionary algorithms – both require similar set up. The user creates a  
544 **Batch** object that specifies the range of parameters values to be explored and the run configuration (*e.g.*,  
545 use 48 cores on a cluster with SLURM workload manager). For evolutionary algorithms and optionally for  
546 grid search, the user provides a Python function that acts as the algorithm fitness function, which can  
547 include variables from the network and simulation output data (*e.g.*, average firing rate of a population).  
548 The tool website includes documentation and examples on how to run the different types of batch  
549 simulations.

550 Once the batch configuration is completed, the user can call the `Batch.run()` method to trigger the  
551 execution of the batch simulations. Internally, NetPyNE iterates over the different parameter  
552 combinations. For each one, NetPyNE will **1.** set the varying parameters in the simulation configuration  
553 (`SimConfig` object) and save it to file, **2.** launch a job to run the NEURON simulation based on the run  
554 options provided by the user (*e.g.*, submit a SLURM job), **3.** store the simulation output with a unique  
555 filename, and **4.** repeat for the next parameter set, or if using evolutionary algorithms, calculate the fitness  
556 values and the next generation of individuals (parameter sets).

557 To implement the evolutionary algorithm optimization we made use of the Inspyred Python package  
558 (<https://pythonhosted.org/inspyred/>). Inspyred subroutines are particularized to the neural environment,  
559 directly using parameters and fitness values obtained from NetPyNE data structures, and running parallel  
560 simulations under the NEURON environment either in multiprocessor machines via MPI or  
561 supercomputers via workload managers.

## 562 4.5 Graphical User Interface

563 The NetPyNE GUI is implemented on top of Geppetto,<sup>95</sup> an open-source platform that provides the  
564 infrastructure for building tools for visualizing neuroscience models and data and managing simulations in  
565 a highly accessible way. The GUI is defined using Javascript, React and HTML5. This offers a flexible and  
566 intuitive way to create advanced layouts while still enabling each of the elements of the interface to be  
567 synchronized with the Python model. The interactive Python backend is implemented as a Jupyter

568 Notebook extension which provides direct communication with the Python kernel. This makes it possible  
569 to synchronize the data model underlying the GUI with a custom Python-based NetPyNE model. This  
570 functionality is at the heart of the GUI and means any change made to the NetPyNE model in Python  
571 kernel is immediately reflected in the GUI and vice versa. The tool's GUI is available at  
572 <https://github.com/MetaCell/NetPyNE-UI> and is under active development.

## 573 Acknowledgements

574 This work was funded by the following grants: NIH grant U01EB017695, DOH01-C32250GG-3450000, NIH  
575 R01EB022903, NIH R01MH086638, and NIH 2R01DC012947-06A1. PG was funded by the Wellcome Trust  
576 (101445). We are thankful to all the contributors that have collaborated in the development of this open  
577 source tool via GitHub (<https://github.com/Neurosim-lab/netpyne>).

## 578 Competing Interests

579 None of the authors have competing interests.

## 580 References

- 581 <sup>1</sup> Cornelia Bargmann, William Newsome, A Anderson, E Brown, K Deisseroth, J Donoghue, P MacLeish,  
582 E Marder, R Normann, J Sanes, et al. Brain 2025: a scientific vision. *Brain Research through Advancing  
583 Innovative Neurotechnologies (BRAIN) Working Group Report to the Advisory Committee to the  
584 Director, NIH*, 2014.
- 585 <sup>2</sup> Henry Markram, Eilif Muller, Srikanth Ramaswamy, Michael W. Reimann, Marwan Abdellah,  
586 Carlos Aguado Sanchez, Anastasia Ailamaki, Lidia Alonso-Nanclares, Nicolas Antille, Selim Arsever, Guy  
587 Antoine Atenekeng Kahou, Thomas K. Berger, Ahmet Bilgili, Nenad Buncic, Athanassia Chalimourda,  
588 Giuseppe Chindemi, Jean-Denis Courcol, Fabien Delalondre, Vincent Delattre, Shaul Druckmann,  
589 Raphael Dumusc, James Dynes, Stefan Eilemann, Eyal Gal, Michael Emiel Gevaert, Jean-Pierre  
590 Ghobril, Albert Gidon, Joe W. Graham, Anirudh Gupta, Valentin Haenel, Etay Hay, Thomas Heinis,  
591 Juan B. Hernando, Michael Hines, Lida Kanari, Daniel Keller, John Kenyon, Georges Khazen, Yihwa  
592 Kim, James G. King, Zoltan Kisvarday, Pramod Kumbhar, Sébastien Lasserre, Jean-Vincent Le Bé,  
593 Bruno R. C. Magalhães, Angel Merchán-Pérez, Julie Meystre, Benjamin Roy Morrice, Jeffrey Muller,  
594 Alberto Muñoz-Céspedes, Shruti Muralidhar, Keerthan Muthurasa, Daniel Nachbaur, Taylor H. Newton,  
595 Max Nolte, Aleksandr Ovcharenko, Juan Palacios, Luis Pastor, Rodrigo Perin, Rajnish Ranjan, Imad  
596 Riachi, José-Rodrigo Rodríguez, Juan Luis Riquelme, Christian Rössert, Konstantinos Sfyarakis, Ying  
597 Shi, Julian C. Shillcock, Gilad Silberberg, Ricardo Silva, Farhan Tauheed, Martin Telefont, Maria  
598 Toledo-Rodriguez, Thomas Tränkler, Werner Van Geit, Jafet Villafranca Díaz, Richard Walker, Yun  
599 Wang, Stefano M. Zaninetta, Javier DeFelipe, Sean L. Hill, Idan Segev, and Felix Schürmann.  
600 Reconstruction and simulation of neocortical microcircuitry. *Cell*, 163(2):456–492, 2015/10/09 2015.

- 601 <sup>3</sup> Frances K Skinner. Cellular-based modeling of oscillatory dynamics in brain networks. *Current opinion*  
602 *in neurobiology*, 22(4):660–669, 2012.
- 603 <sup>4</sup> Michael Hawrylycz, Costas Anastassiou, Anton Arkhipov, Jim Berg, Michael Buice, Nicholas Cain,  
604 Nathan W Gouwens, Sergey Gratiy, Ramakrishnan Iyer, Jung Hoon Lee, et al. Inferring cortical function  
605 in the mouse visual system through large-scale systems neuroscience. *Proceedings of the National*  
606 *Academy of Sciences*, 113(27):7337–7344, 2016.
- 607 <sup>5</sup> Patricia S Churchland and Terrence J Sejnowski. Blending computational and experimental  
608 neuroscience. *Nature Reviews Neuroscience*, 2016.
- 609 <sup>6</sup> Anne K Churchland and L F Abbott. Conceptual and technical advances define a key moment for  
610 theoretical neuroscience. *Nat Neurosci*, 19(3):348–349, 03 2016.
- 611 <sup>7</sup> John P Cunningham and M Yu Byron. Dimensionality reduction for large-scale neural recordings.  
612 *Nature neuroscience*, 2014.
- 613 <sup>8</sup> Ruben A. Tikiđji-Hamburyan, Vikram Narayana, Zeki Bozkus, and Tarek A. El-Ghazawi. Software for  
614 brain network simulations: A comparative study. *Frontiers in Neuroinformatics*, 11:46, 2017.
- 615 <sup>9</sup> Robert A. McDougal, Thomas M. Morse, Ted Carnevale, Luis Marenco, Rixin Wang, Michele Migliore,  
616 Perry L. Miller, Gordon M. Shepherd, and Michael L. Hines. Twenty years of modeldb and beyond:  
617 building essential modeling tools for the future of neuroscience. *Journal of Computational Neuroscience*,  
618 pages 1–10, 2016.
- 619 <sup>10</sup> WW Lytton, AH Seidenstein, S Dura-Bernal, RA McDougal, F Schürmann, and ML Hines. Simulation  
620 neurotechnologies for advancing brain research: parallelizing large networks in NEURON. *Neural*  
621 *Comput*, 28:2063–2090, 2016.
- 622 <sup>11</sup> Lealem Mulugeta, Andrew Drach, Ahmet Erdemir, CA Hunt, Marc Horner, Joy P Ku, Jerry G Myers,  
623 Jr, Rajanikanth Vadigepalli, and William W Lytton. Credibility, replicability, and reproducibility in  
624 simulation for biomedicine and clinical applications in neuroscience. *Front. Neuroinform.*, 12:18, April  
625 2018.
- 626 <sup>12</sup> RA McDougal, AS Bulanova, and WW Lytton. Reproducibility in computational neuroscience models  
627 and simulations. *IEEE Trans Biomed Eng*, 63:2021–2035, 2016.
- 628 <sup>13</sup> Pdraig Gleeson, Sharon Crook, Robert C. Cannon, Michael L. Hines, Guy O. Billings, Matteo Farinella,  
629 Thomas M. Morse, Andrew P. Davison, Subhasis Ray, Upinder S. Bhalla, Simon R. Barnes, Yoana D.  
630 Dimitrova, and R. Angus Silver. Neuroml: A language for describing data driven models of neurons and  
631 networks with a high degree of biological detail. *PLoS Comput Biol*, 6(6):e1000815, 06 2010.
- 632 <sup>14</sup> Robert C Cannon, Pdraig Gleeson, Sharon Crook, Gautham Ganapathy, Boris Marin, Eugenio Piasini,  
633 and R. Angus Silver. LEMS: A language for expressing complex biological models in concise and  
634 hierarchical form and its use in underpinning NeuroML 2. *Frontiers in Neuroinformatics*, 8(79), 2014.
- 635 <sup>15</sup> Robert A McDougal, Anna S Bulanova, and William W Lytton. Reproducibility in computational  
636 neuroscience models and simulations. *IEEE Transactions on Biomedical Engineering*, 63(10):2021–2035,  
637 2016.



- 638 <sup>16</sup> Padraig Gleeson, Volker Steuber, and R Angus Silver. neuroconstruct: a tool for modeling networks of  
639 neurons in 3d space. *Neuron*, 54(2):219–235, 2007.
- 640 <sup>17</sup> Andrew Davison, Daniel Brüderle, Jochen Eppler, Jens Kremkow, Eilif Muller, Dejan Pecevski, Laurent  
641 Perrinet, and Pierre Yger. Pynn: a common interface for neuronal network simulators. *Frontiers in*  
642 *Neuroinformatics*, 2:11, 2009.
- 643 <sup>18</sup> James Bednar. Topographica: building and analyzing map-level simulations from python, c/c++,  
644 matlab, nest, or neuron components. *Frontiers in Neuroinformatics*, 3:8, 2009.
- 645 <sup>19</sup> Sergey G. Aleksin, Kaiyu Zheng, Dmitri A. Rusakov, and Leonid P. Savtchenko. Arachne: A  
646 neural-neuroglial network builder with remotely controlled parallel computing. *PLOS Computational*  
647 *Biology*, 13(3):1–14, 03 2017.
- 648 <sup>20</sup> Sergey L. Gratiy, Yazan N. Billeh, Kael Dai, Catalin Mitelut, David Feng, Nathan W. Gouwens,  
649 Nicholas Cain, Christof Koch, Costas A. Anastassiou, and Anton Arkhipov. Bionet: A python interface  
650 to neuron for modeling large-scale networks. *PLOS ONE*, 13(8):1–18, 08 2018.
- 651 <sup>21</sup> Robert McDougal, Michael Hines, and William Lytton. Reaction-diffusion in the neuron simulator.  
652 *Frontiers in Neuroinformatics*, 7:28, 2013.
- 653 <sup>22</sup> Adam J. H. Newton, Robert A. McDougal, Michael L. Hines, and William W. Lytton. Using neuron for  
654 reaction-diffusion modeling of extracellular dynamics. *Frontiers in Neuroinformatics*, 12:41, 2018.
- 655 <sup>23</sup> S Dura-Bernal, SA Neymotin, BA Suter, GMG Shepherd, and WW Lytton. Long-range inputs and  
656 h-current regulate different modes of operation in a multiscale model of mouse m1 microcircuits.  
657 *bioRxiv*, (201707), 2018.
- 658 <sup>24</sup> Cecilia Romaro, Fernando Araujo Najman, Salvador Dura-Bernal, and Antonio Carlos Roque.  
659 Implementation of the potjans-diesmann cortical microcircuit model in netpyne/neuron with rescaling  
660 option. In *27th Annual Computational Neuroscience Meeting, CNS\*18*, 2018.
- 661 <sup>25</sup> William Lytton, Jing Xuan Limb, Salvador Dura-Bernal, and George J. Augustine. Computer models of  
662 claustrum subnetworks. In Brian N. Mathur, David Reser, and Jared B. Smith, editors, *Conference*  
663 *Proceedings: 3rd Annual Society for Claustrum Research Meeting, Claustrum*, volume 2:1, page 1349859,  
664 2017.
- 665 <sup>26</sup> Samuel A Neymotin, Salvador Dura-Bernal, Peter Lakatos, Terence David Sanger, and William Lytton.  
666 Multitarget multiscale simulation for pharmacological treatment of dystonia in motor cortex. *Frontiers*  
667 *in Pharmacology*, 7(157), 2016.
- 668 <sup>27</sup> Stephanie R Jones, Dominique L Pritchett, Michael A Sikora, Steven M Stufflebeam, Matti Hämäläinen,  
669 and Christopher I Moore. Quantitative analysis and biophysically realistic neural modeling of the meg  
670 mu rhythm: rhythmogenesis and modulation of sensory-evoked responses. *Journal of neurophysiology*,  
671 102(6):3554–3572, 2009.
- 672 <sup>28</sup> S. A. Neymotin, D. S. Daniels, N. Peled, R. A. McDougal, N. T. Carnevale, C. I. Moore, S. Dura-Bernal,  
673 ML Hines, and S Jones. Human neocortical neurosolver (hnn). doi: 10.5281/zenodo.1446517, 2018.

- 674 <sup>29</sup> Padraig Gleeson, Matteo Cantarelli, Boris Marin, Adrian Quintana, Matt Earnshaw, Eugenio Piasini,  
675 Justas Birgiolas, Robert C Cannon, N Alex Cayco-Gajic, Sharon Crook, et al. Open source brain: a  
676 collaborative resource for visualizing, analyzing, simulating and developing standardized models of  
677 neurons and circuits. *bioRxiv*, page 229484, 2018.
- 678 <sup>30</sup> Subhashini Sivagnanam, Amit Majumdar, Kenneth Yoshimoto, Vadim Astakhov, Anita Bandrowski,  
679 Maryann E Martone, and Nicholas T Carnevale. Introducing the neuroscience gateway. In *IWSG*, 2013.
- 680 <sup>31</sup> WW Lytton and M Stewart. Rule-based firing for network simulations. *Neurocomputing*, 69:1160–1164,  
681 2006.
- 682 <sup>32</sup> Richard Naud, Nicolas Marcille, Claudia Clopath, and Wulfram Gerstner. Firing patterns in the  
683 adaptive exponential integrate-and-fire model. *Biol. Cybern.*, 99(4-5):335–347, 2008.
- 684 <sup>33</sup> EM Izhikevich. Simple Model of Spiking Neurons. *IEEE Trans Neural Networks*, 14:1569–1572, 2003.
- 685 <sup>34</sup> ML Hines and NT Carnevale. Expanding NEURON’s repertoire of mechanisms with NMODL. *Neural  
686 Computation*, 12:995–1007, 2000.
- 687 <sup>35</sup> SA Neymotin, RA McDougal, AS Bulanova, M Zeki, P Lakatos, D Terman, ML Hines, and WW Lytton.  
688 Calcium regulation of hcn channels supports persistent activity in a multiscale model of neocortex.  
689 *Neuroscience*, 316:344–366, 2016.
- 690 <sup>36</sup> S.L. Angulo, R. Orman, S.A. Neymotin, L. Liu, L. Buitrago, E. Cepeda-Prado, D. Stefanov, W.W.  
691 Lytton, M. Stewart, S.A. Small, K.E. Duff, and H. Moreno. Tau and amyloid-related pathologies in the  
692 entorhinal cortex have divergent effects in the hippocampal circuit. *Neurobiology of Disease*,  
693 108(Supplement C):261 – 276, 2017.
- 694 <sup>37</sup> Leopoldo Petreanu, Tianyi Mao, Scott M Sternson, and Karel Svoboda. The subcellular organization of  
695 neocortical excitatory connections. *Nature*, 457(7233):1142–1145, 2009.
- 696 <sup>38</sup> Charles T. Anderson, Patrick L. Sheets, Taro Kiritani, and Gordon M. G. Shepherd. Sublayer-specific  
697 microcircuits of corticospinal and corticostriatal neurons in motor cortex. *Nature neuroscience*,  
698 13(6):739–44, June 2010.
- 699 <sup>39</sup> Benjamin A Suter and Gordon MG Shepherd. Reciprocal interareal connections to corticospinal neurons  
700 in mouse m1 and s2. *The Journal of Neuroscience*, 35(7):2959–2974, 2015.
- 701 <sup>40</sup> Bryan M Hooks, Tianyi Mao, Diego A Gutnisky, Naoki Yamawaki, Karel Svoboda, and Gordon M G  
702 Shepherd. Organization of cortical and thalamic input to pyramidal neurons in mouse motor cortex. *J  
703 Neurosci*, 33(2):748–760, Jan 2013.
- 704 <sup>41</sup> Marianne J Bezaire, Ivan Raikov, Kelly Burk, Dhruvil Vyas, and Ivan Soltesz. Interneuronal  
705 mechanisms of hippocampal theta oscillation in a full-scale model of the rodent ca1 circuit. *eLife*,  
706 5:e18566, 2016.
- 707 <sup>42</sup> M Hereld, RL Stevens, J Teller, and W van Drongelen. Large Neural Simulations on Large Parallel  
708 Computers. *Int. J. for Bioelectromagnetism*, 7:44–46, 2005.

- 709 <sup>43</sup> Michael Hines, Sameer Kumar, and Felix Schürmann. Comparison of neuronal spike exchange methods  
710 on a blue gene/p supercomputer. *Frontiers in Computational Neuroscience*, 5(49), 2011.
- 711 <sup>44</sup> Michael L Hines, Hubert Eichner, and Felix Schürmann. Neuron splitting in compute-bound parallel  
712 network simulations enables runtime scaling with twice as many processors. *Journal of computational*  
713 *neuroscience*, 25(1):203–210, 2008.
- 714 <sup>45</sup> M Migliore, C Cannia, WW Lytton, and ML Hines. Parallel network simulations with NEURON. *J.*  
715 *Computational Neuroscience*, 6:119–129, 2006.
- 716 <sup>46</sup> John Towns, Timothy Cockerill, Maytal Dahan, Ian Foster, Kelly Gauthier, Andrew Grimshaw, Victor  
717 Hazlewood, Scott Lathrop, Dave Lifka, Gregory D Peterson, et al. Xsede: accelerating scientific  
718 discovery. *Computing in Science & Engineering*, 16(5):62–74, 2014.
- 719 <sup>47</sup> Katrin Amunts, Christoph Ebell, Jeff Muller, Martin Telefont, Alois Knoll, and Thomas Lippert. The  
720 human brain project: Creating a european research infrastructure to decode the human brain. *Neuron*,  
721 92(3):574–581, 2017/04/17 2017.
- 722 <sup>48</sup> Dorian Krause and Philipp Thörnig. Jureca: Modular supercomputer at jülich supercomputing centre.  
723 *Journal of large-scale research facilities JLSRF*, 4:132, 2018.
- 724 <sup>49</sup> Michele Migliore, C Cannia, William W Lytton, Henry Markram, and Michael L Hines. Parallel network  
725 simulations with neuron. *Journal of computational neuroscience*, 21(2):119–129, 2006.
- 726 <sup>50</sup> Tobias C. Potjans and Markus Diesmann. The cell-type specific cortical microcircuit: Relating structure  
727 and activity in a full-scale spiking network model. *Cerebral Cortex*, 24(3):785–806, 2014.
- 728 <sup>51</sup> Thomas Kreuz, Mario Mulansky, and Nebojsa Bozanic. Spiky: A graphical user interface for monitoring  
729 spike train synchrony. *Journal of Neurophysiology*, 113(9):3432–3445, 2015.
- 730 <sup>52</sup> H Lindén, E Hagen, S Leski, ES Norheim, KH Pettersen, and GT Einevoll. LFPy: a tool for biophysical  
731 simulation of extracellular potentials generated by detailed model neurons. *Front Neuroinform*, 7:41,  
732 2013.
- 733 <sup>53</sup> Harilal Parasuram, Bipin Nair, Egidio D’Angelo, Michael Hines, Giovanni Naldi, and Shyam Diwakar.  
734 Computational modeling of single neuron extracellular electric potentials and network local field  
735 potentials using lfpsim. *Frontiers in Computational Neuroscience*, 10:65, 2016.
- 736 <sup>54</sup> György Buzsáki, Costas A Anastassiou, and Christof Koch. The origin of extracellular fields and  
737 currents—eeg, ecog, lfp and spikes. *Nature reviews neuroscience*, 13(6):407, 2012.
- 738 <sup>55</sup> Dan Goodman and Romain Brette. Brian: a simulator for spiking neural networks in python. *Frontiers*  
739 *in Neuroinformatics*, 2:5, 2008.
- 740 <sup>56</sup> JM Bower and D Beeman. *The book of Genesis: exploring realistic neural models with the GEneral*  
741 *NEural Simulation System*. 1998. Science and Business Media, Springer, New York, 2012.
- 742 <sup>57</sup> Subhasis Ray and Upinder Bhalla. Pymoose: interoperable scripting in python for moose. *Frontiers in*  
743 *Neuroinformatics*, 2:6, 2008.

- 744 <sup>58</sup> Gerald M Edelman and Joseph A Gally. Degeneracy and complexity in biological systems. *Proc Nat*  
745 *Acad Sci*, 98:13763–13768, 2001.
- 746 <sup>59</sup> AA Prinz, D Bucher, and E Marder. Similar network activity from disparate circuit parameters. *Nat*  
747 *Neurosci*, 7:1345–1352, 2004.
- 748 <sup>60</sup> SA Neymotin, S Dura-Bernal, P Lakatos, TD Sanger, and WW Lytton. Multitarget multiscale  
749 simulation for pharmacological treatment of dystonia in motor cortex. *Front Pharmacol*, 7:157, 2016.
- 750 <sup>61</sup> Samuel A Neymotin, Heekyung Lee, Eunhye Park, Andre A Fenton, and William W Lytton. Emergence  
751 of physiological oscillation frequencies in a computer model of neocortex. *Front Comput Neurosci*, 5:19,  
752 2011.
- 753 <sup>62</sup> Andrew T Knox, Tracy Glauser, Jeffrey Tenney, William W Lytton, and Katherine Holland. Modeling  
754 pathogenesis and treatment response in childhood absence epilepsy. *Epilepsia*, 59(1):135–145, 2018.
- 755 <sup>63</sup> W Van Geit, Erik De Schutter, and Pablo Achard. Automated neuron model optimization techniques: a  
756 review. *Biological cybernetics*, 99(4-5):241–251, 2008.
- 757 <sup>64</sup> Carmen G Moles, Pedro Mendes, and Julio R Banga. Parameter estimation in biochemical pathways: a  
758 comparison of global optimization methods. *Genome research*, 13(11):2467–2474, 2003.
- 759 <sup>65</sup> S. Dura-Bernal, S. A. Neymotin, C. C. Kerr, S. Sivagnanam, A. Majumdar, J. T. Francis, and W. W.  
760 Lytton. Evolutionary algorithm optimization of biological learning parameters in a biomimetic  
761 neuroprosthesis. *IBM Journal of Research and Development*, 61(2/3):6:1–6:14, March 2017.
- 762 <sup>66</sup> SA Neymotin, BA Suter, S Dura-Bernal, GM Shepherd, M Migliore, and WW Lytton. Optimizing  
763 computer models of corticospinal neurons to replicate in vitro dynamics. *J Neurophysiol*, 117:148–162,  
764 2017.
- 765 <sup>67</sup> Kristofor David Carlson, Jayram M Nageswaran, Nikil Dutt, and Jeffrey L Krichmar. An efficient  
766 automated parameter tuning framework for spiking neural networks. *Frontiers in Neuroscience*, 8(10),  
767 2014.
- 768 <sup>68</sup> Timothy H Rumbell, Danel Draguljić, Aniruddha Yadav, Patrick R Hof, Jennifer I Luebke, and  
769 Christina M Weaver. Automated evolutionary optimization of ion channel conductances and kinetics in  
770 models of young and aged rhesus monkey pyramidal neurons. *Journal of Computational Neuroscience*,  
771 41(1):65–90, 2016.
- 772 <sup>69</sup> Pablo Achard and Erik De Schutter. Complex parameter landscape for a complex neuron model. *PLoS*  
773 *Comput Biol*, 2(7):e94, 2006.
- 774 <sup>70</sup> Nathan W Gouwens, Jim Berg, David Feng, Staci A Sorensen, Hongkui Zeng, Michael J Hawrylycz,  
775 Christof Koch, and Anton Arkhipov. Systematic generation of biophysically detailed models for diverse  
776 cortical neuron types. *Nature Communications*, 9(1):710, 2018.
- 777 <sup>71</sup> Robert A McDougal, Thomas M Morse, Michael L Hines, and Gordon M Shepherd. ModelView for  
778 ModelDB: Online presentation of model structure. *Neuroinformatics*, 13(4):459–470, October 2015.

- 779 <sup>72</sup> Benjamin A Suter, Michele Migliore, and Gordon MG Shepherd. Intrinsic electrophysiology of mouse  
780 corticospinal neurons: a class-specific triad of spike-related properties. *Cerebral Cortex*, 23(8):1965–1977,  
781 2013.
- 782 <sup>73</sup> Naoki Yamawaki, Katharine Borges, Benjamin A Suter, Kenneth D Harris, and Gordon MG Shepherd.  
783 A genuine layer 4 in motor cortex with prototypical synaptic circuit connectivity. *Elife*, 3:e05422, 2015.
- 784 <sup>74</sup> Naoki Yamawaki and Gordon M G Shepherd. Synaptic circuit organization of motor corticothalamic  
785 neurons. *The Journal of Neuroscience*, 35(5):2293–2307, 2015.
- 786 <sup>75</sup> Kenneth D Harris and Gordon MG Shepherd. The neocortical circuit: themes and variations. *Nature*  
787 *Neuroscience*, 18(2):170–181, 2015.
- 788 <sup>76</sup> Patrick L Sheets, Benjamin A Suter, Taro Kiritani, C Savio Chan, D James Surmeier, and Gordon MG  
789 Shepherd. Corticospinal-specific hcn expression in mouse motor cortex: Ih-dependent synaptic  
790 integration as a candidate microcircuit mechanism involved in motor control. *Journal of neurophysiology*,  
791 106(5):2216–2231, 2011.
- 792 <sup>77</sup> Nicholas Weiler, Lydia Wood, Jianing Yu, Sara A Solla, and Gordon M G Shepherd. Top-down laminar  
793 organization of the excitatory network in motor cortex. *Nat Neurosci*, 11(3):360–366, Mar 2008.
- 794 <sup>78</sup> Taro Kiritani, Ian R. Wickersham, H. Sebastian Seung, and Gordon M. G. Shepherd. Hierarchical  
795 connectivity and connection-specific dynamics in the corticospinal–corticostriatal microcircuit in mouse  
796 motor cortex. *The Journal of Neuroscience*, 32(14):4992–5001, 2012.
- 797 <sup>79</sup> Alfonso J Apicella, Ian R Wickersham, H Sebastian Seung, and Gordon MG Shepherd. Laminarily  
798 orthogonal excitation of fast-spiking and low-threshold-spiking interneurons in mouse motor cortex. *The*  
799 *Journal of Neuroscience*, 32(20):7021–7033, 2012.
- 800 <sup>80</sup> Julian Tejada, Norberto Garcia-Cairasco, and Antonio C Roque. Combined role of seizure-induced  
801 dendritic morphology alterations and spine loss in newborn granule cells with mossy fiber sprouting on  
802 the hyperexcitability of a computer model of the dentate gyrus. *PLoS computational biology*,  
803 10(5):e1003601, 2014.
- 804 <sup>81</sup> Facundo Rodriguez. Dentate gyrus network model. In *27th Annual Computational Neuroscience*  
805 *Meeting, CNS\*18*, 2018.
- 806 <sup>82</sup> Vassilis Cutsuridis, Stuart Cobb, and Bruce P Graham. Encoding and retrieval in a model of the  
807 hippocampal ca1 microcircuit. *Hippocampus*, 20(3):423–446, 2010.
- 808 <sup>83</sup> Angeles Tepper, Adam Sugi, William Lytton, and Salvador Dura-Bernal. Implementation of ca1  
809 microcircuits model in netpyne and exploration of the effect of neuronal/synaptic loss on memory recall.  
810 In *27th Annual Computational Neuroscience Meeting, CNS\*18*, 2018.
- 811 <sup>84</sup> Salvador Dura-Bernal, Kan Li, Samuel A Neymotin, Joseph T Francis, Jose C Principe, and William W  
812 Lytton. Restoring behavior via inverse neurocontroller in a lesioned cortical spiking model driving a  
813 virtual arm. *Frontiers in Neuroscience*, 10(28), 2016.

- 814 <sup>85</sup> Alexander O. Komendantov and Giorgio A. Ascoli. Dendritic excitability and neuronal morphology as  
815 determinants of synaptic efficacy. *Journal of Neurophysiology*, 101(4):1847–1866, 2009.
- 816 <sup>86</sup> Yoshiyuki Kubota, Satoru Kondo, Masaki Nomura, Sayuri Hatada, Noboru Yamaguchi, Alsayed A  
817 Mohamed, Fuyuki Karube, Joachim Lübke, and Yasuo Kawaguchi. Functional effects of distinct  
818 innervation styles of pyramidal cells by fast spiking cortical interneurons. *eLife*, 4:e07919, jul 2015.
- 819 <sup>87</sup> Werner Van Geit, Michael Gevaert, Giuseppe Chindemi, Christian Rössert, Jean-Denis Courcol, Eilif  
820 Muller, Felix Schürmann, Idan Segev, and Henry Markram. Bluepyopt: Leveraging open source software  
821 and cloud infrastructure to optimise model parameters in neuroscience. *arXiv preprint*  
822 *arXiv:1603.00500*, 2016.
- 823 <sup>88</sup> Péter Friedrich, Michael Vella, Attila I Gulyás, Tamás F Freund, and Szabolcs Káli. A flexible,  
824 interactive software tool for fitting the parameters of neuronal models. *Frontiers in Neuroinformatics*,  
825 8(63), 2014.
- 826 <sup>89</sup> Robert Meyer and Klaus Obermayer. pypet: A python toolkit for data management of parameter  
827 explorations. *Frontiers in Neuroinformatics*, 10:38, 2016.
- 828 <sup>90</sup> 2017.
- 829 <sup>91</sup> Carl-Magnus Svensson, Stephen Coombes, and Jonathan Westley Peirce. Using evolutionary algorithms  
830 for fitting high-dimensional models to neuronal data. *Neuroinformatics*, 10(2):199–218, 2012.
- 831 <sup>92</sup> Maxwell A Sherman, Shane Lee, Robert Law, Saskia Haegens, Catherine A Thorn, Matti S Hämäläinen,  
832 Christopher I Moore, and Stephanie R Jones. Neural mechanisms of transient neocortical beta rhythms:  
833 Converging evidence from humans, computational modeling, monkeys, and mice. *Proceedings of the*  
834 *National Academy of Sciences*, page 201604135, 2016.
- 835 <sup>93</sup> WW Lytton. Computer modelling of epilepsy. *Nat Rev Neurosci*, 9:626–637, 2008.
- 836 <sup>94</sup> John K Salmon, Mark A Moraes, Ron O Dror, and David E Shaw. Parallel random numbers: as easy as  
837 1, 2, 3. In *Proceedings of 2011 International Conference for High Performance Computing, Networking,*  
838 *Storage and Analysis*, page 16. ACM, 2011.
- 839 <sup>95</sup> Matteo Cantarelli, Boris Marin, Adrian Quintana, Matt Earnshaw, Pdraig Gleeson, Salvador  
840 Dura-Bernal, R Angus Silver, and Giovanni Idili. Geppetto: a reusable modular open platform for  
841 exploring neuroscience data and models. *Phil. Trans. R. Soc. B*, 373(1758):20170380, 2018.
